# Supplementary material for: Exonization of active mouse L1s: a driver of transcriptome evolution?
Source: PubMed Central journal article supplement (PMC2176070; doi:10.1186/1471-2164-8-392), 2007-10-26

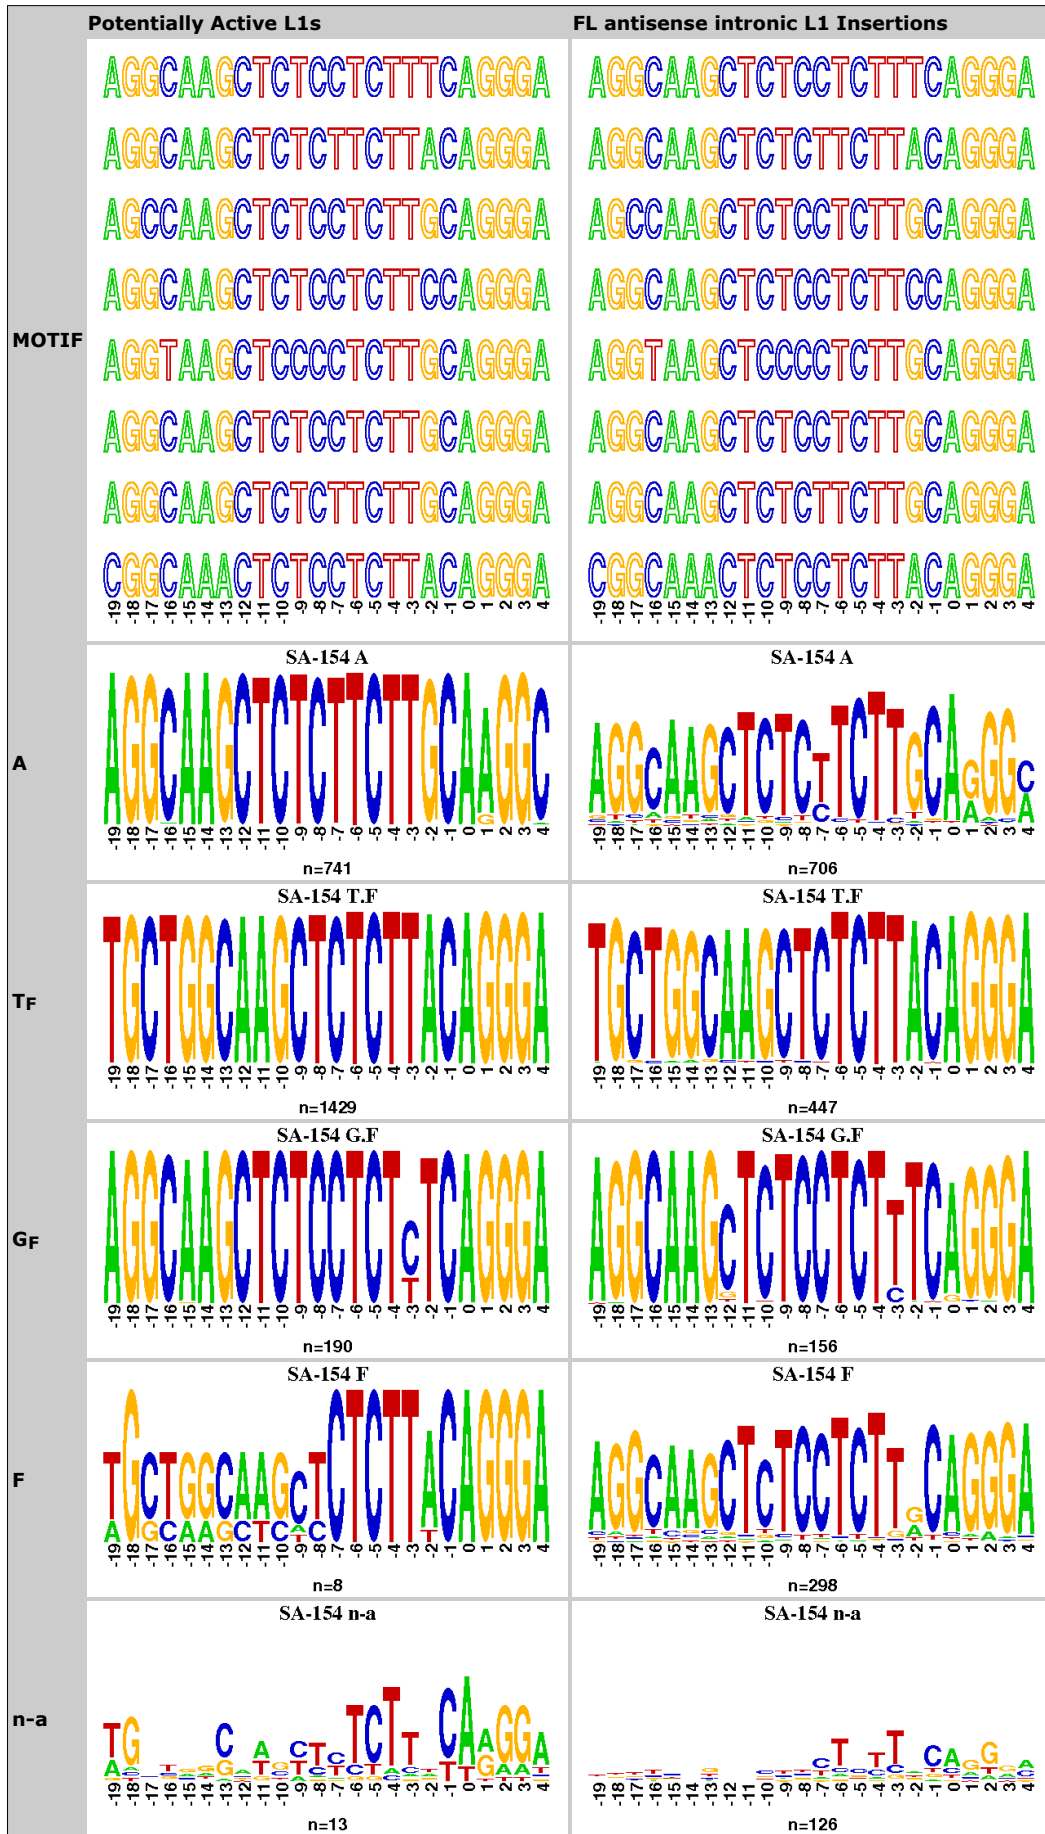

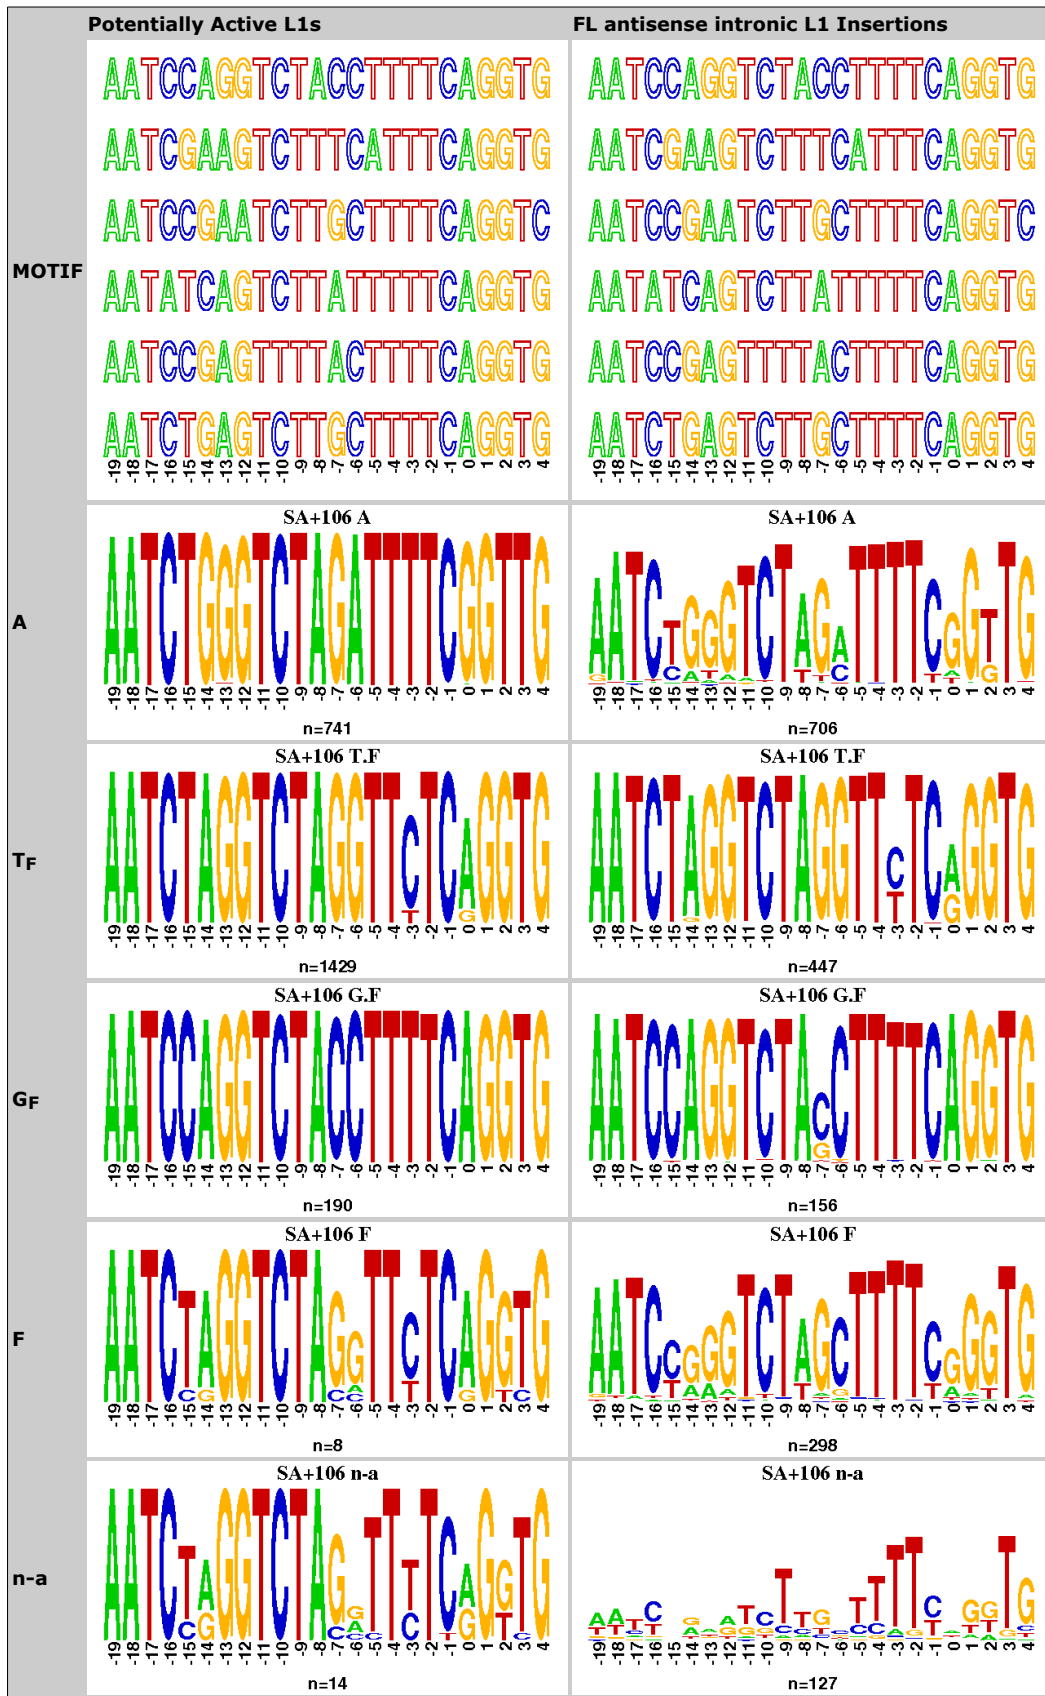

# SA+120

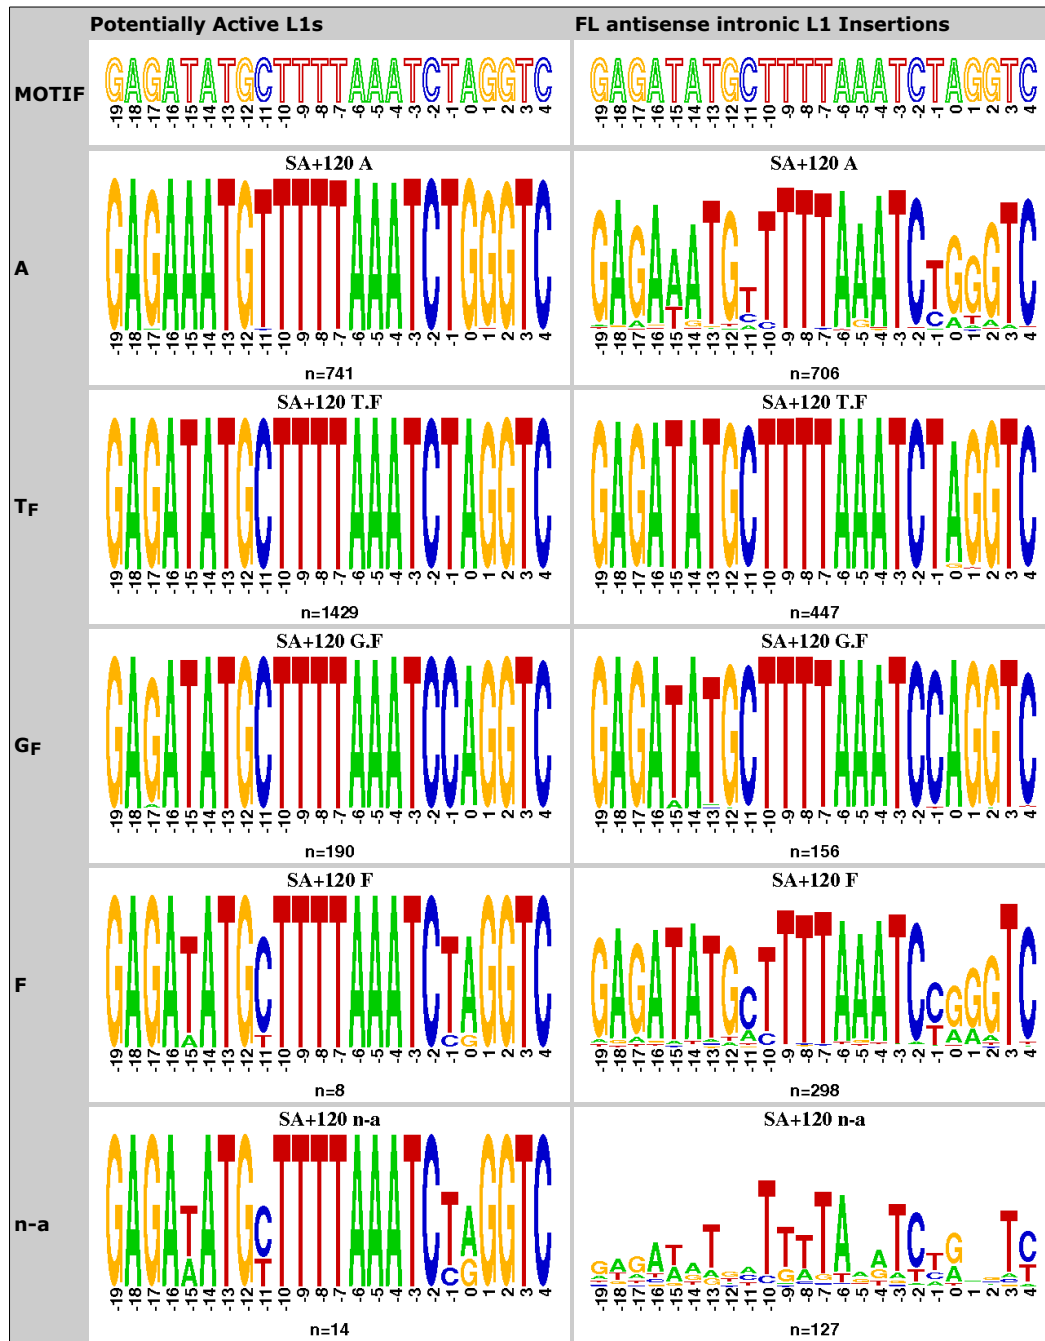

# SA+1930

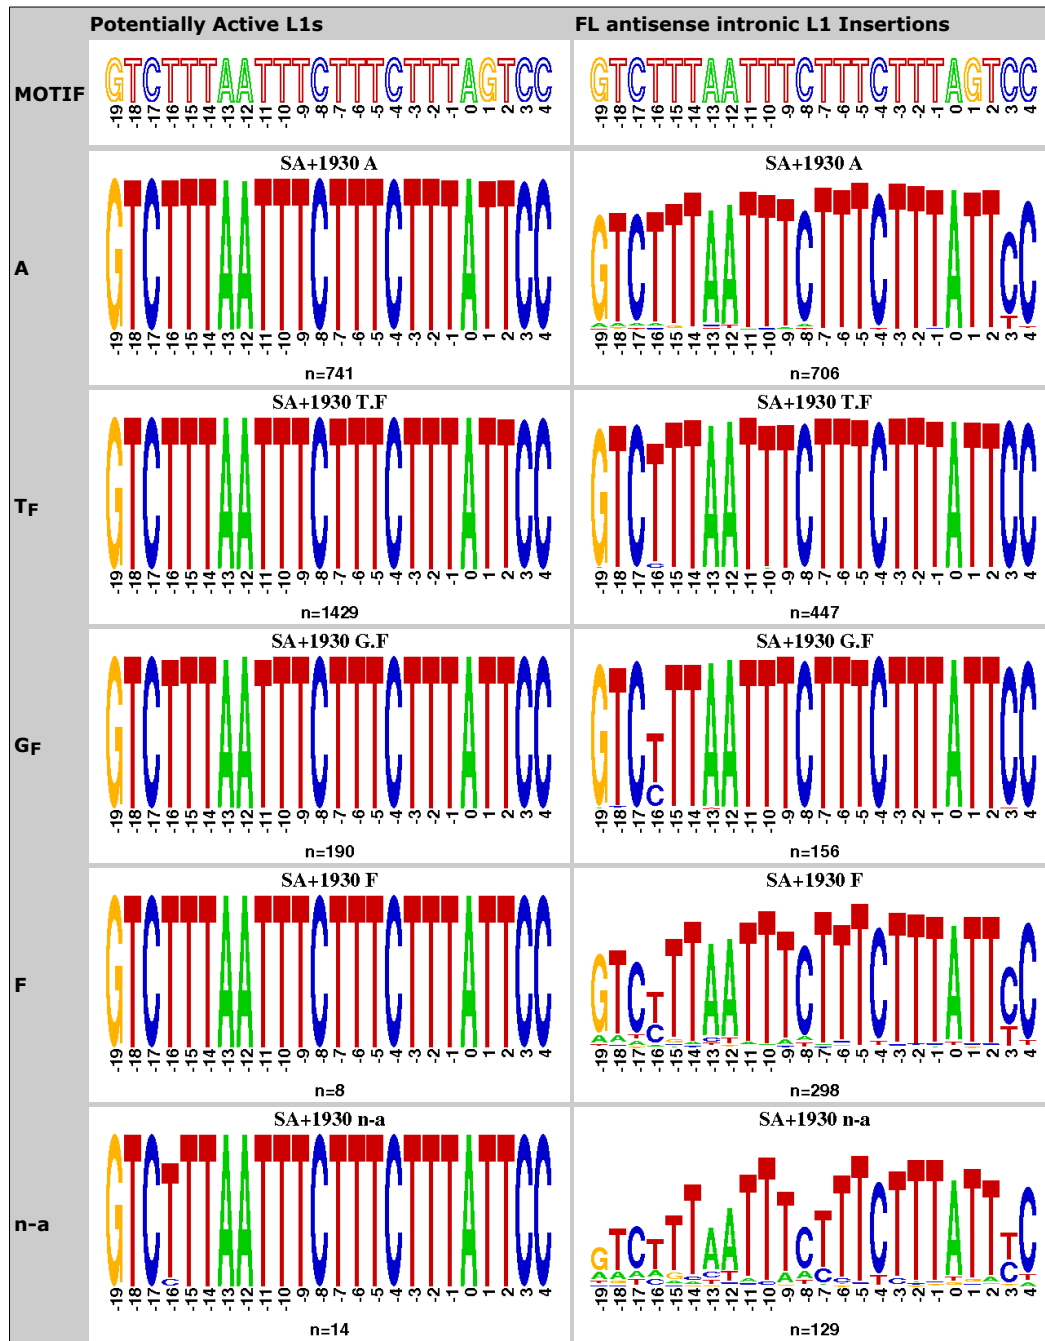

# SA+4117

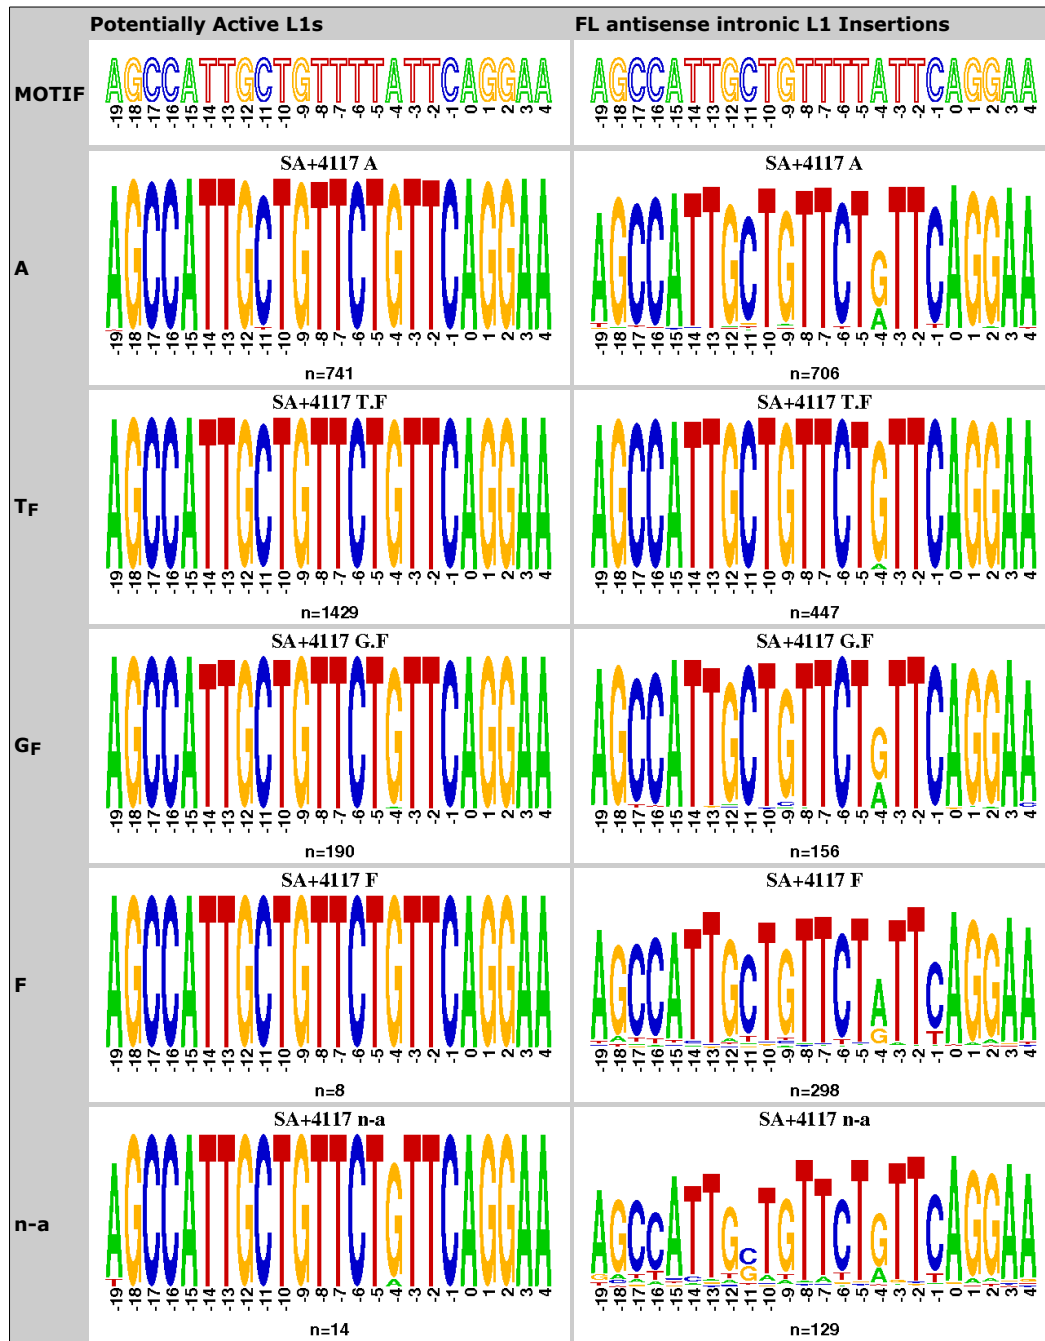

SA+5260

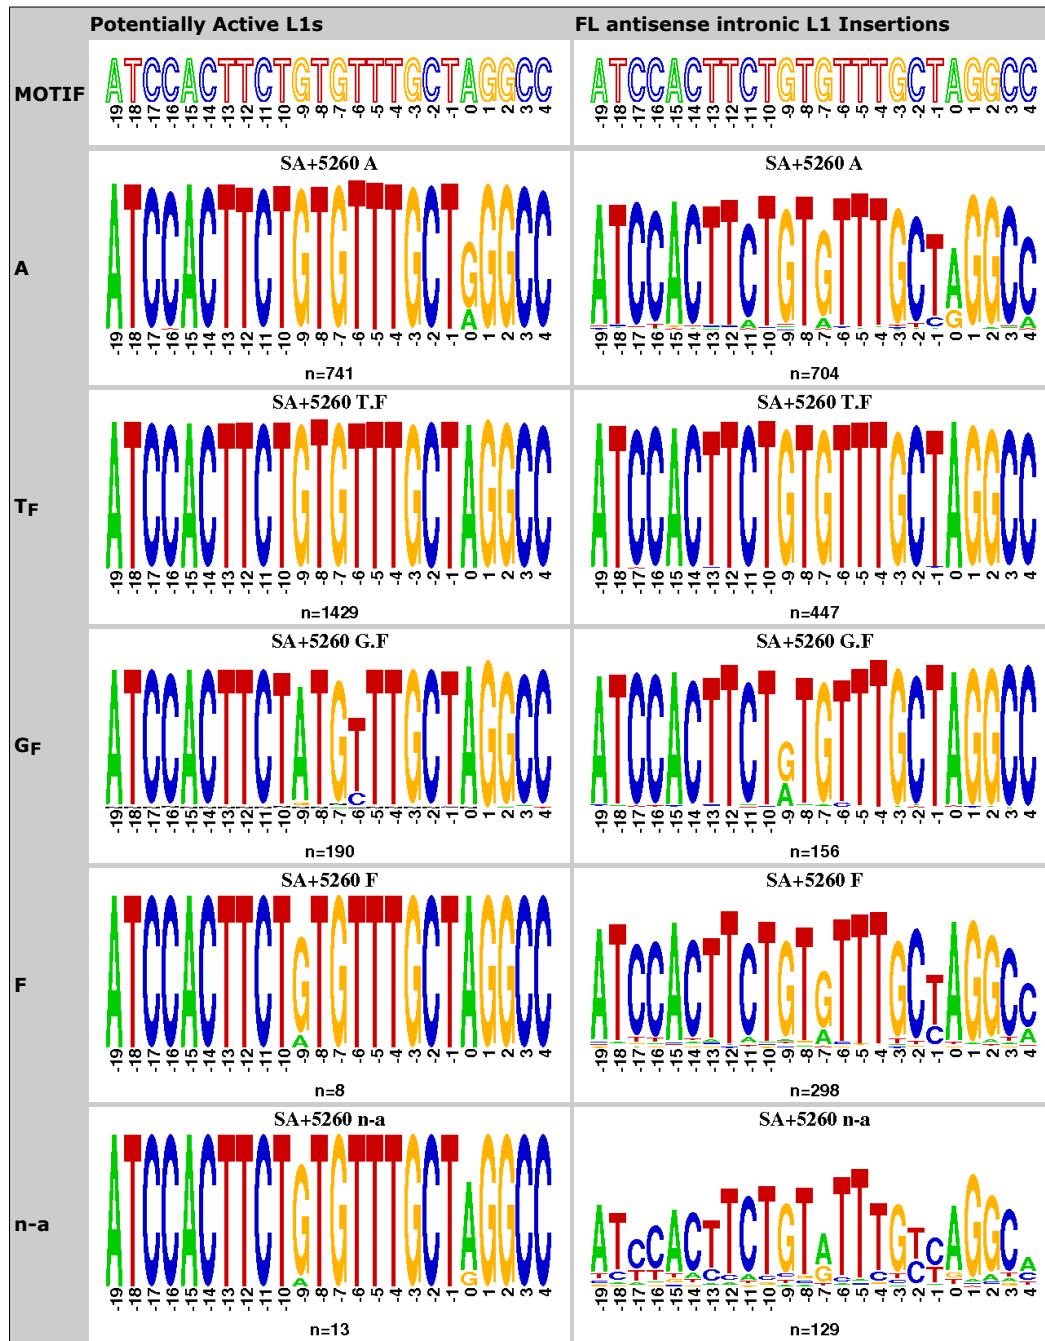

# SA+5614

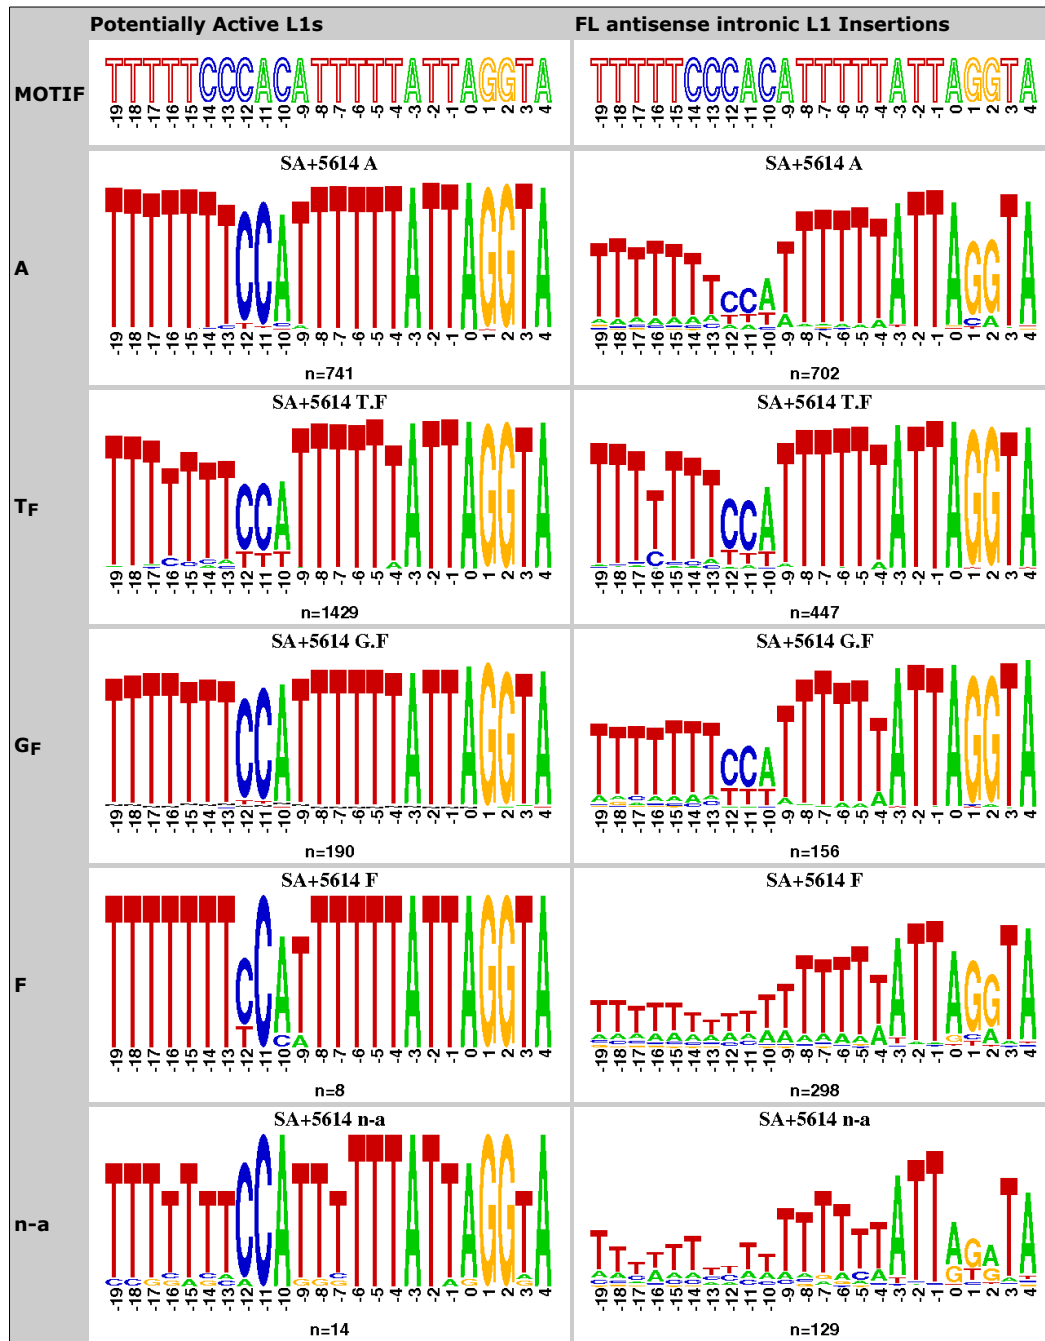

# SD+29

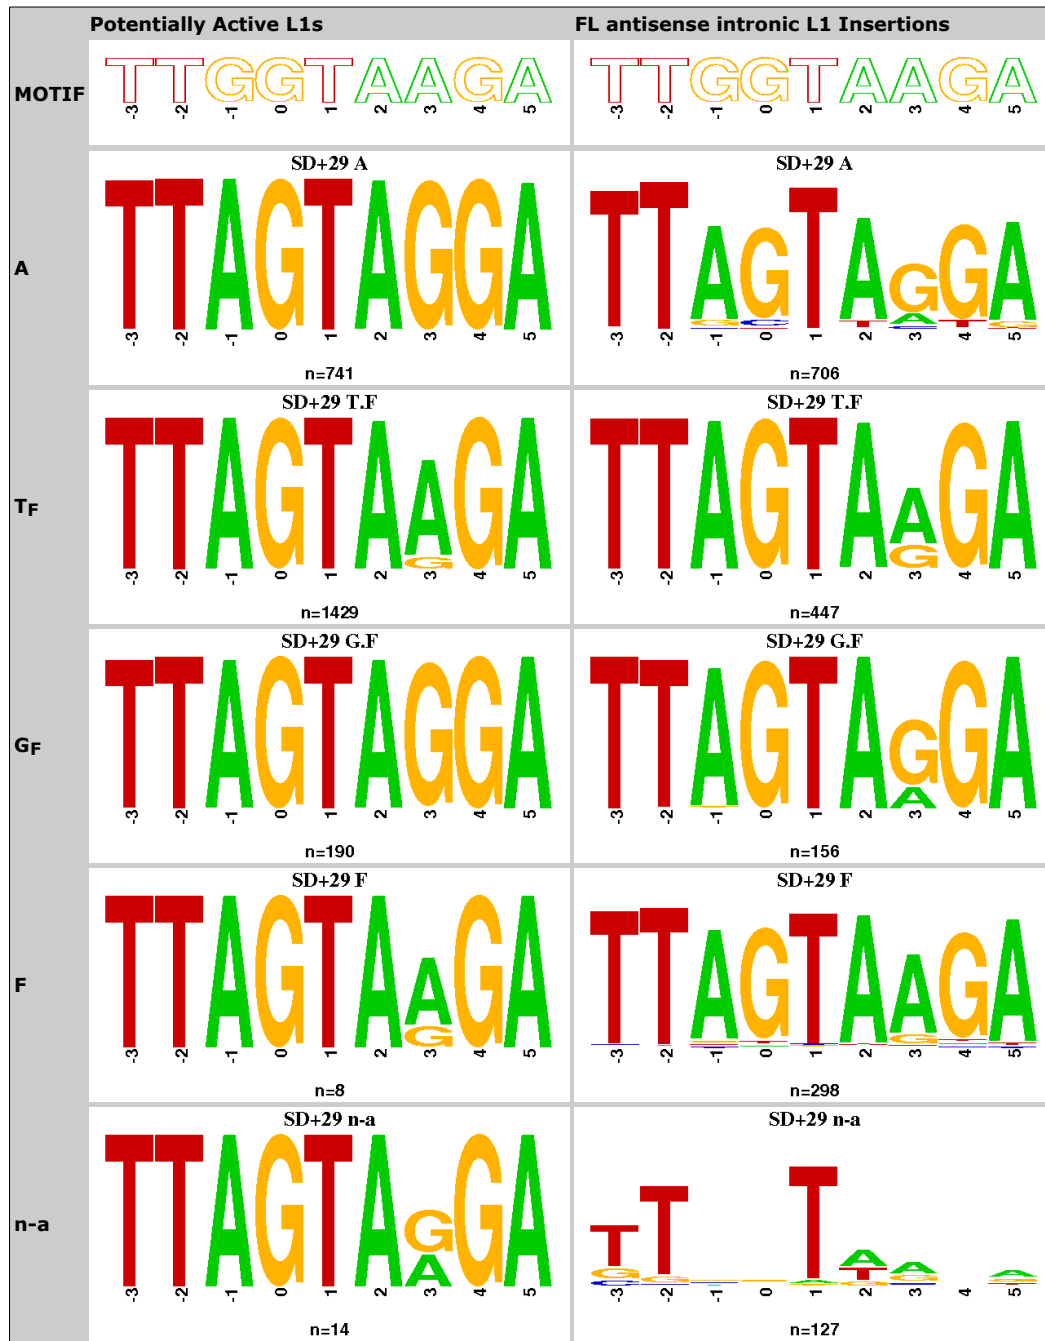



# SD+52

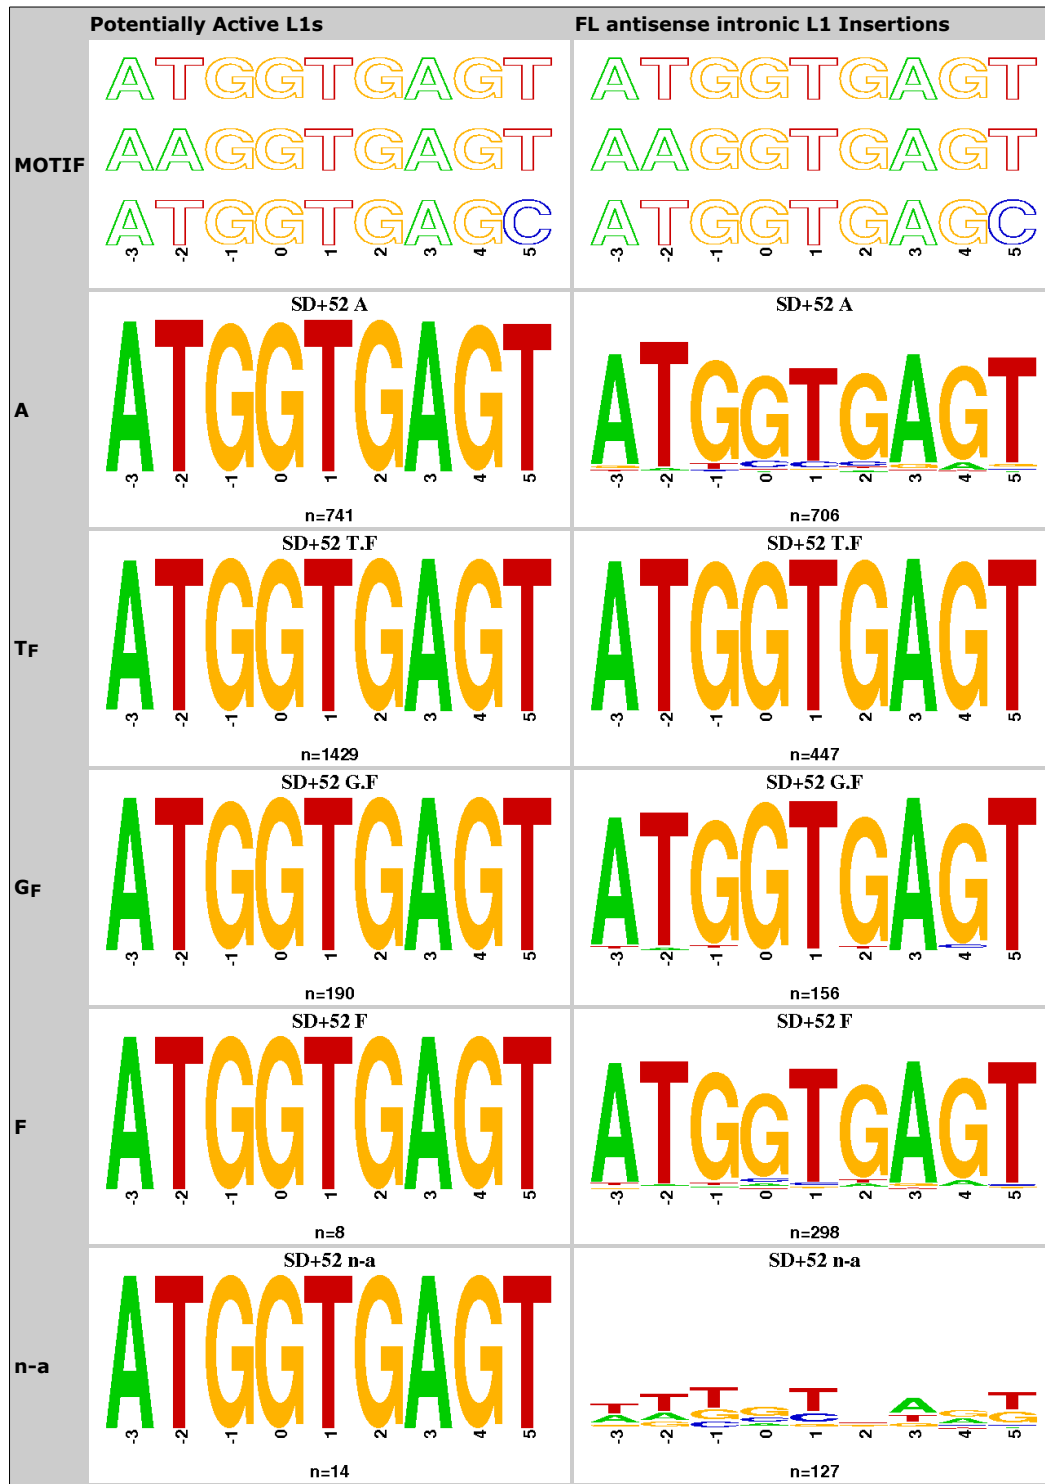

# SD+106

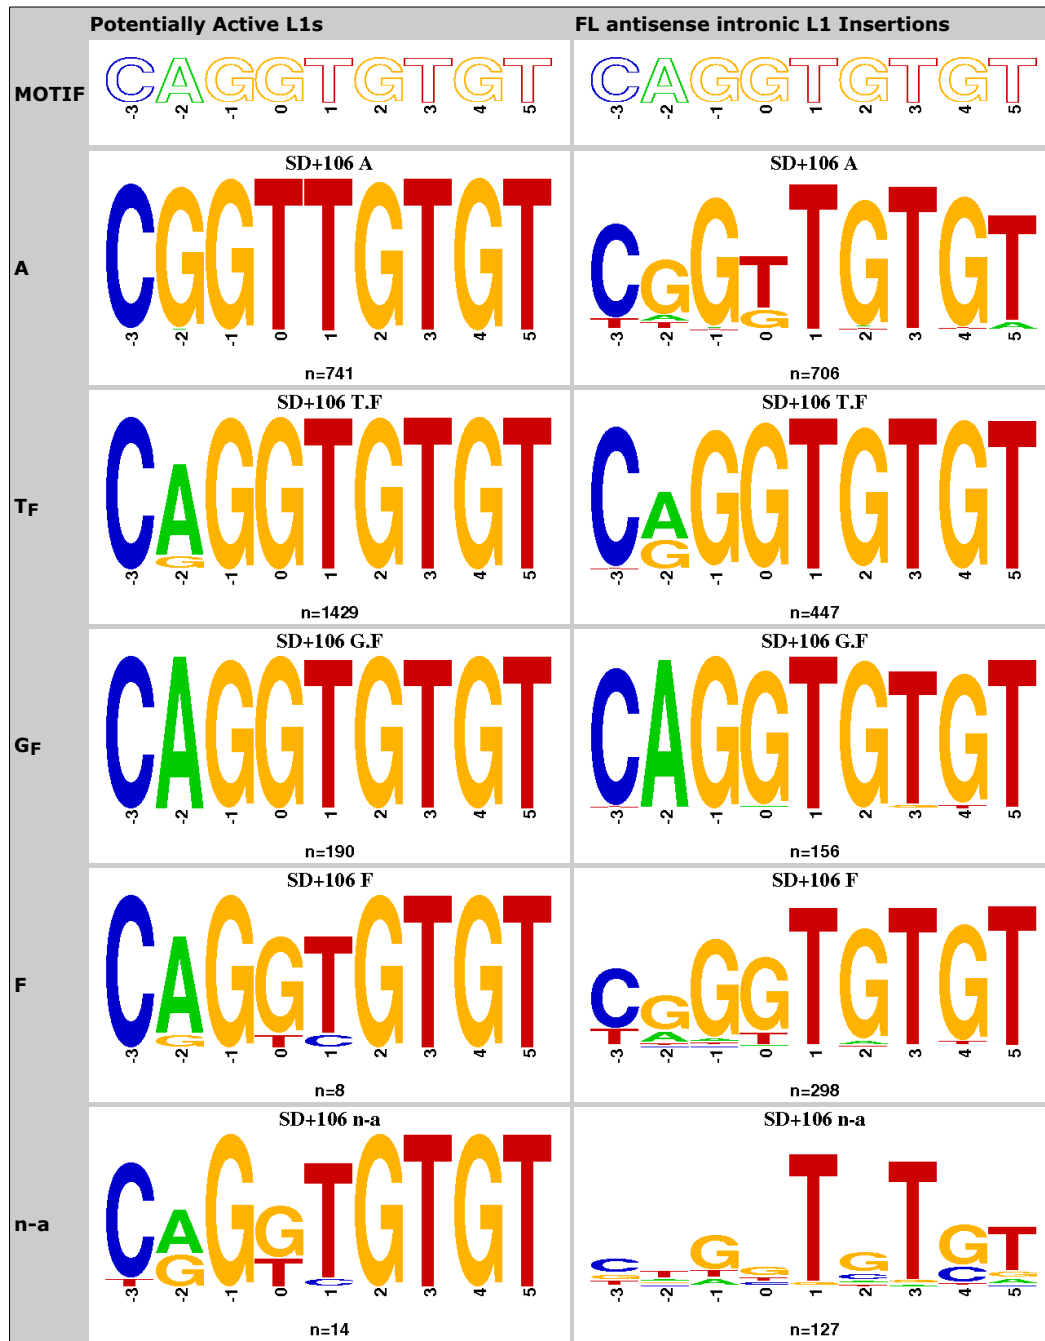

**SD+288**

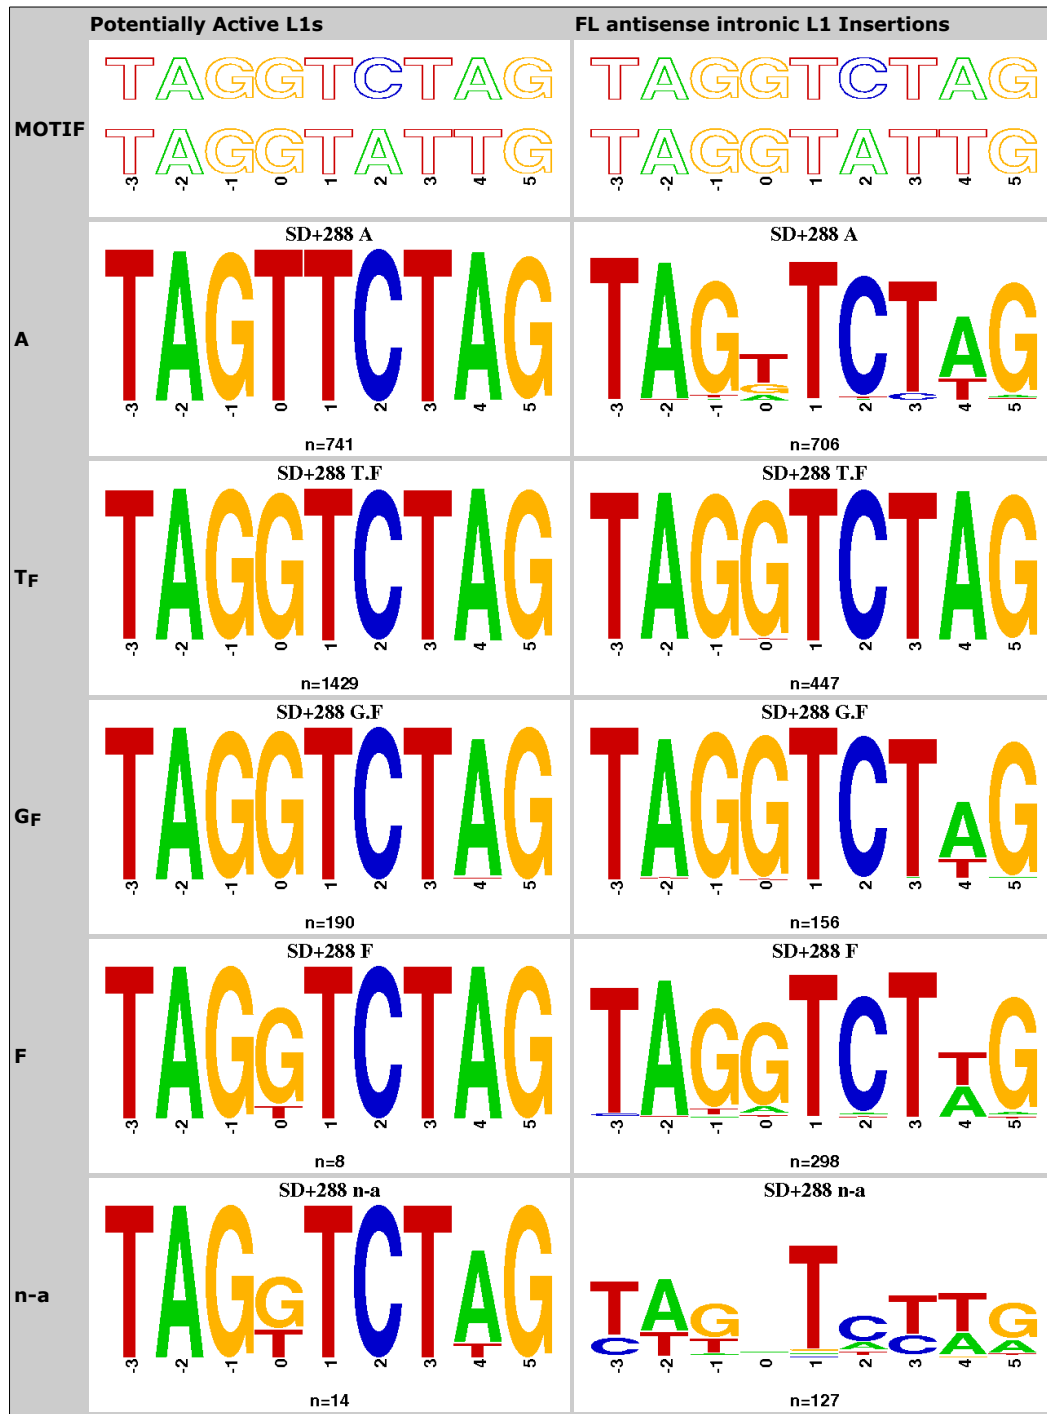

# SD+350

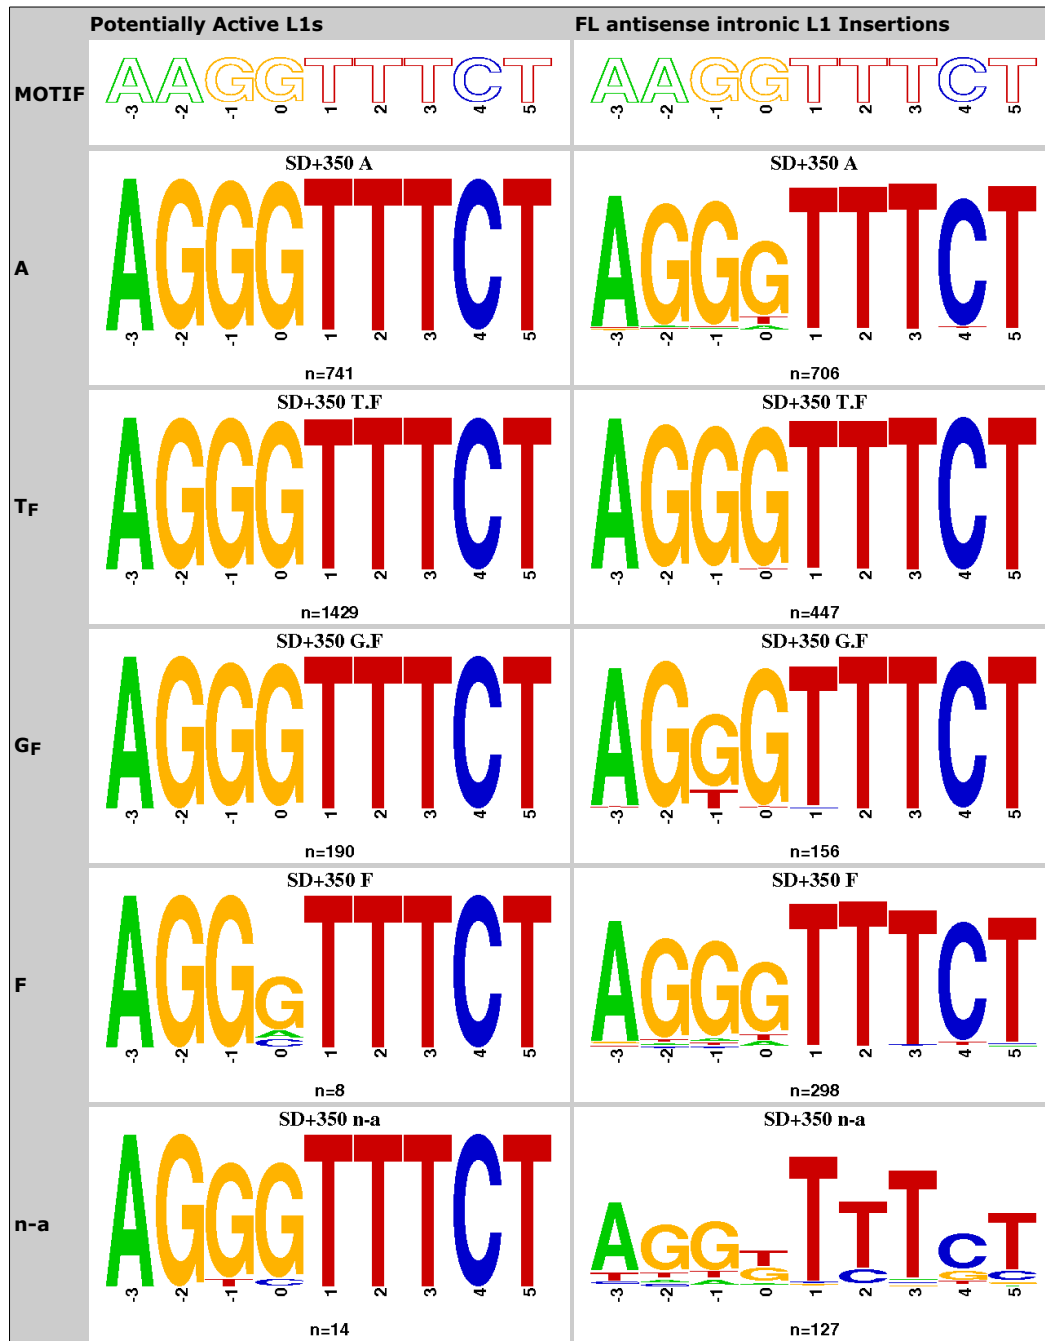

SD+1881

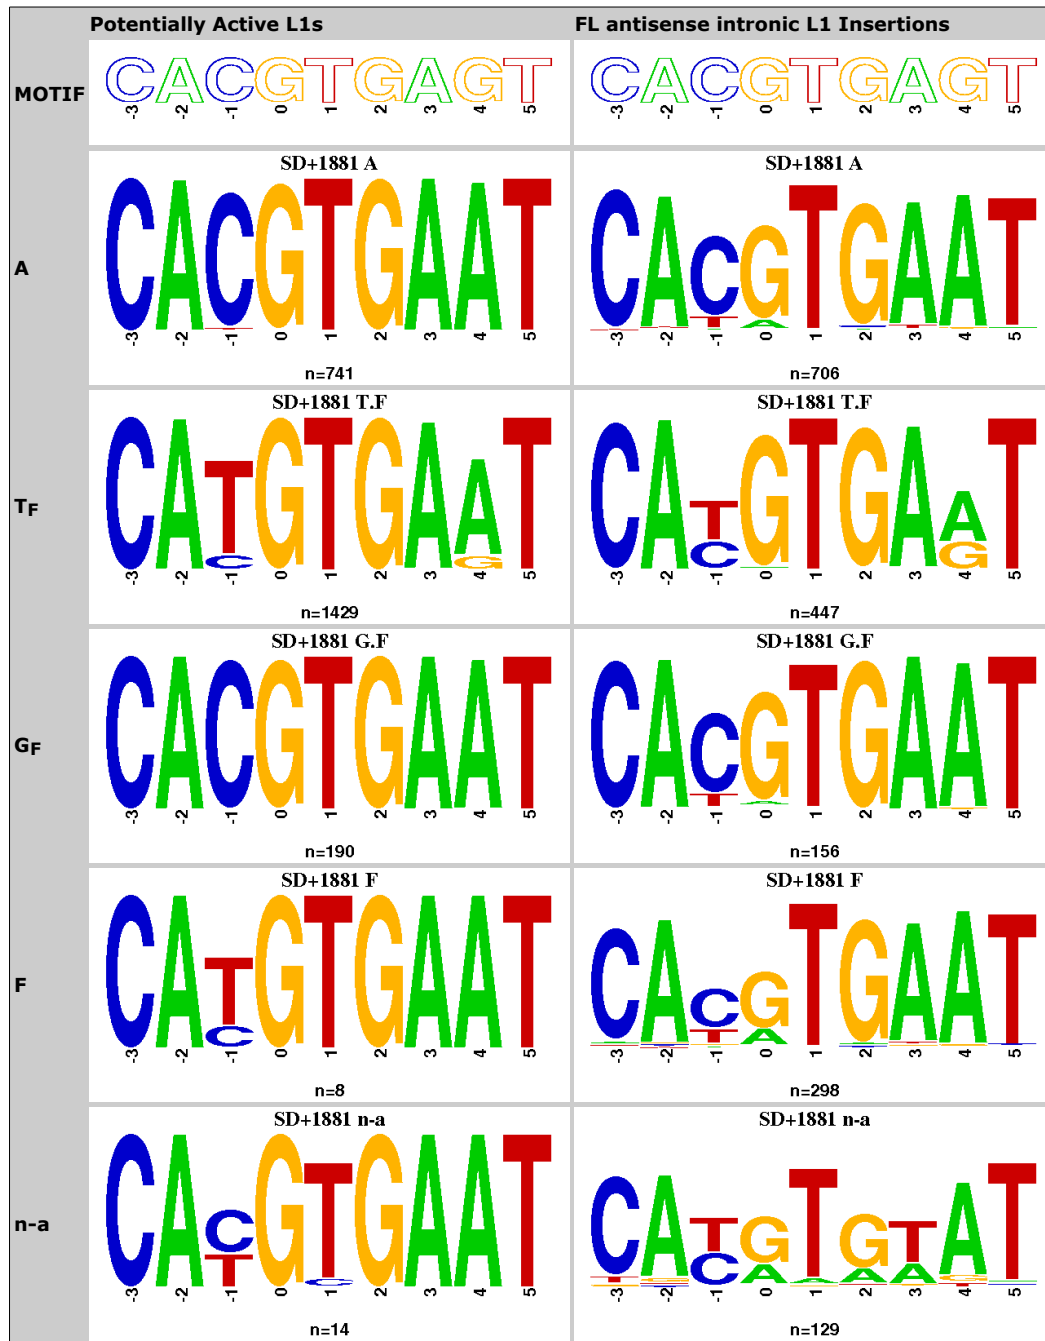

SD+2036

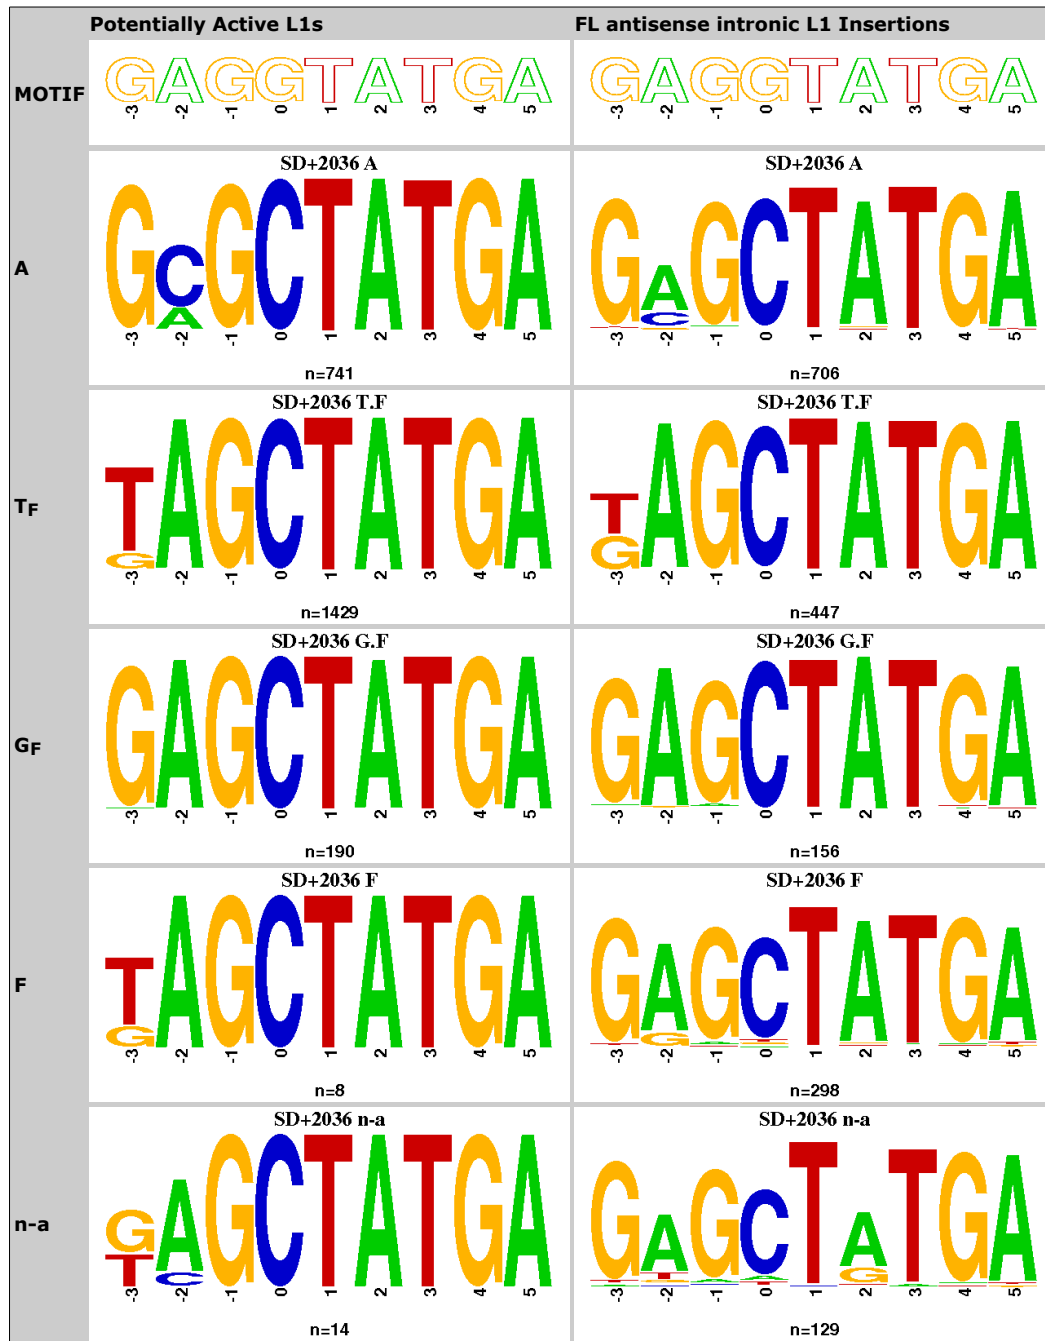

# SD+5094

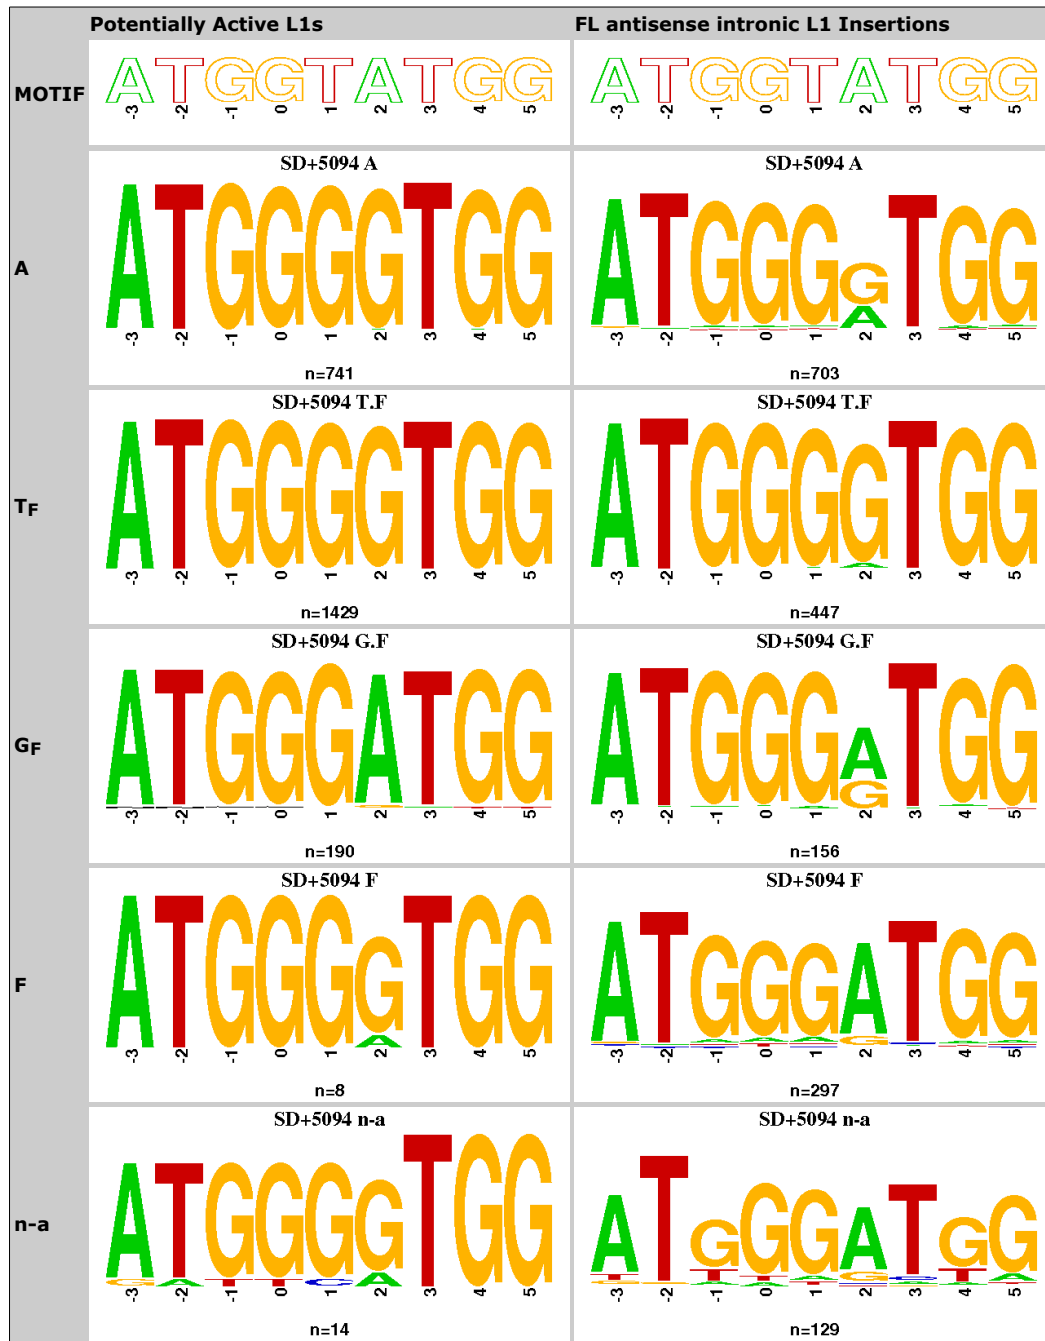

# A\_SA+191

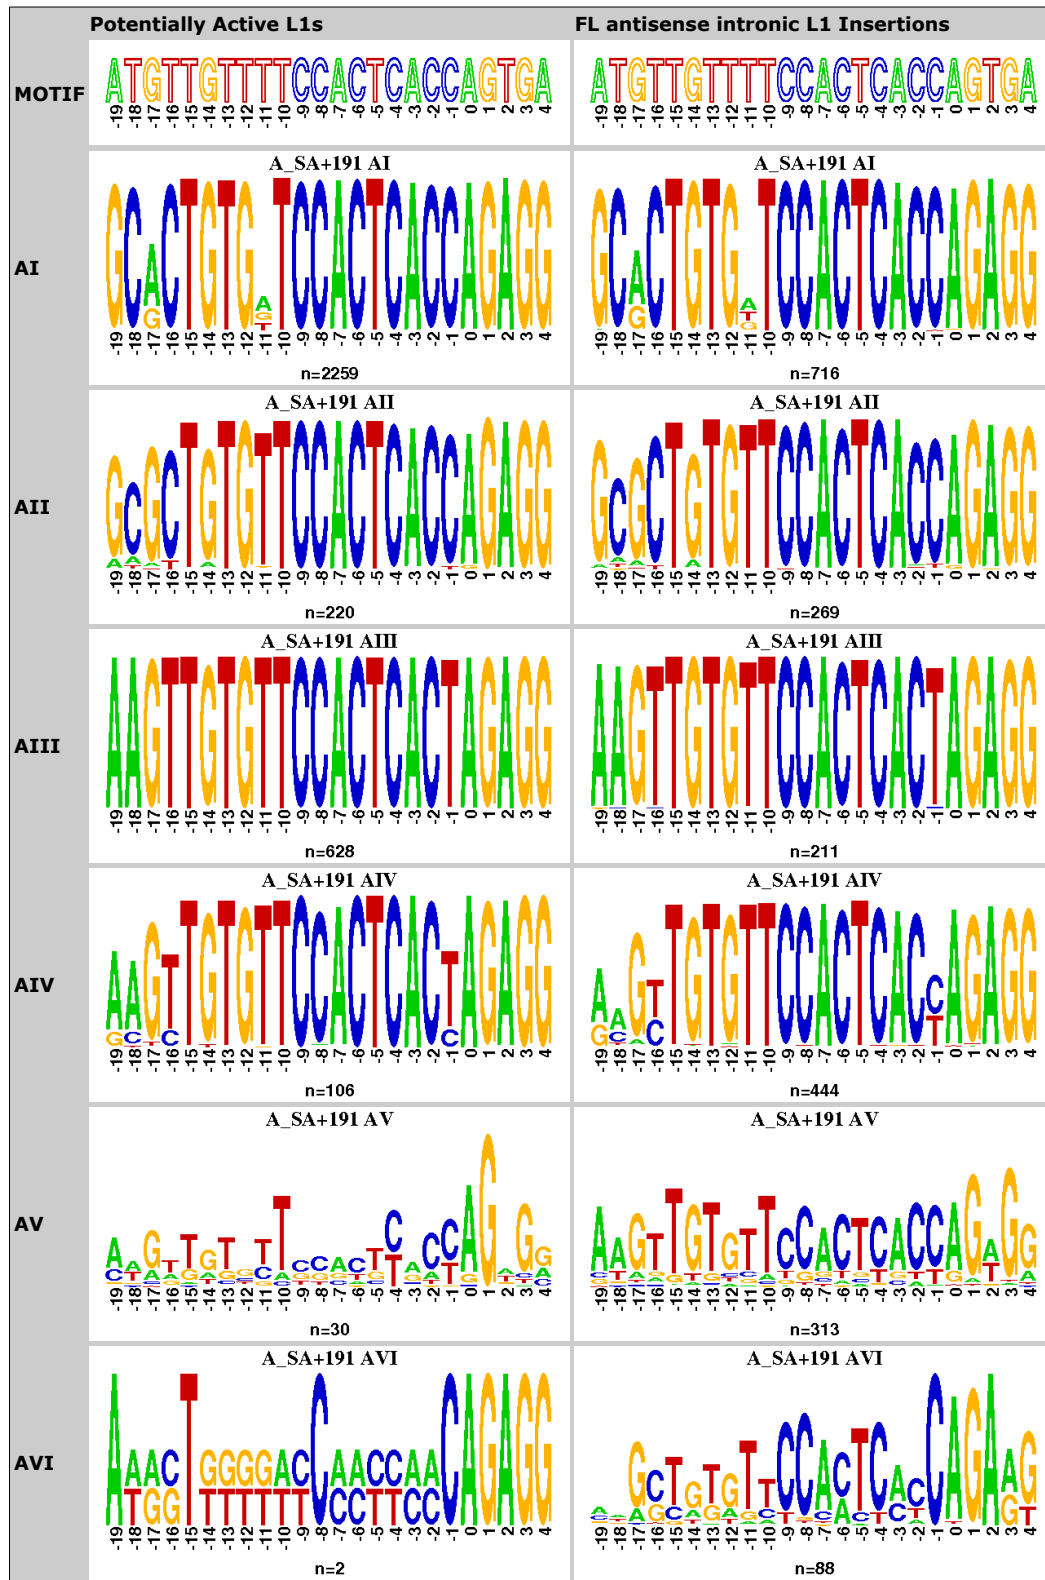



A\_SD+72

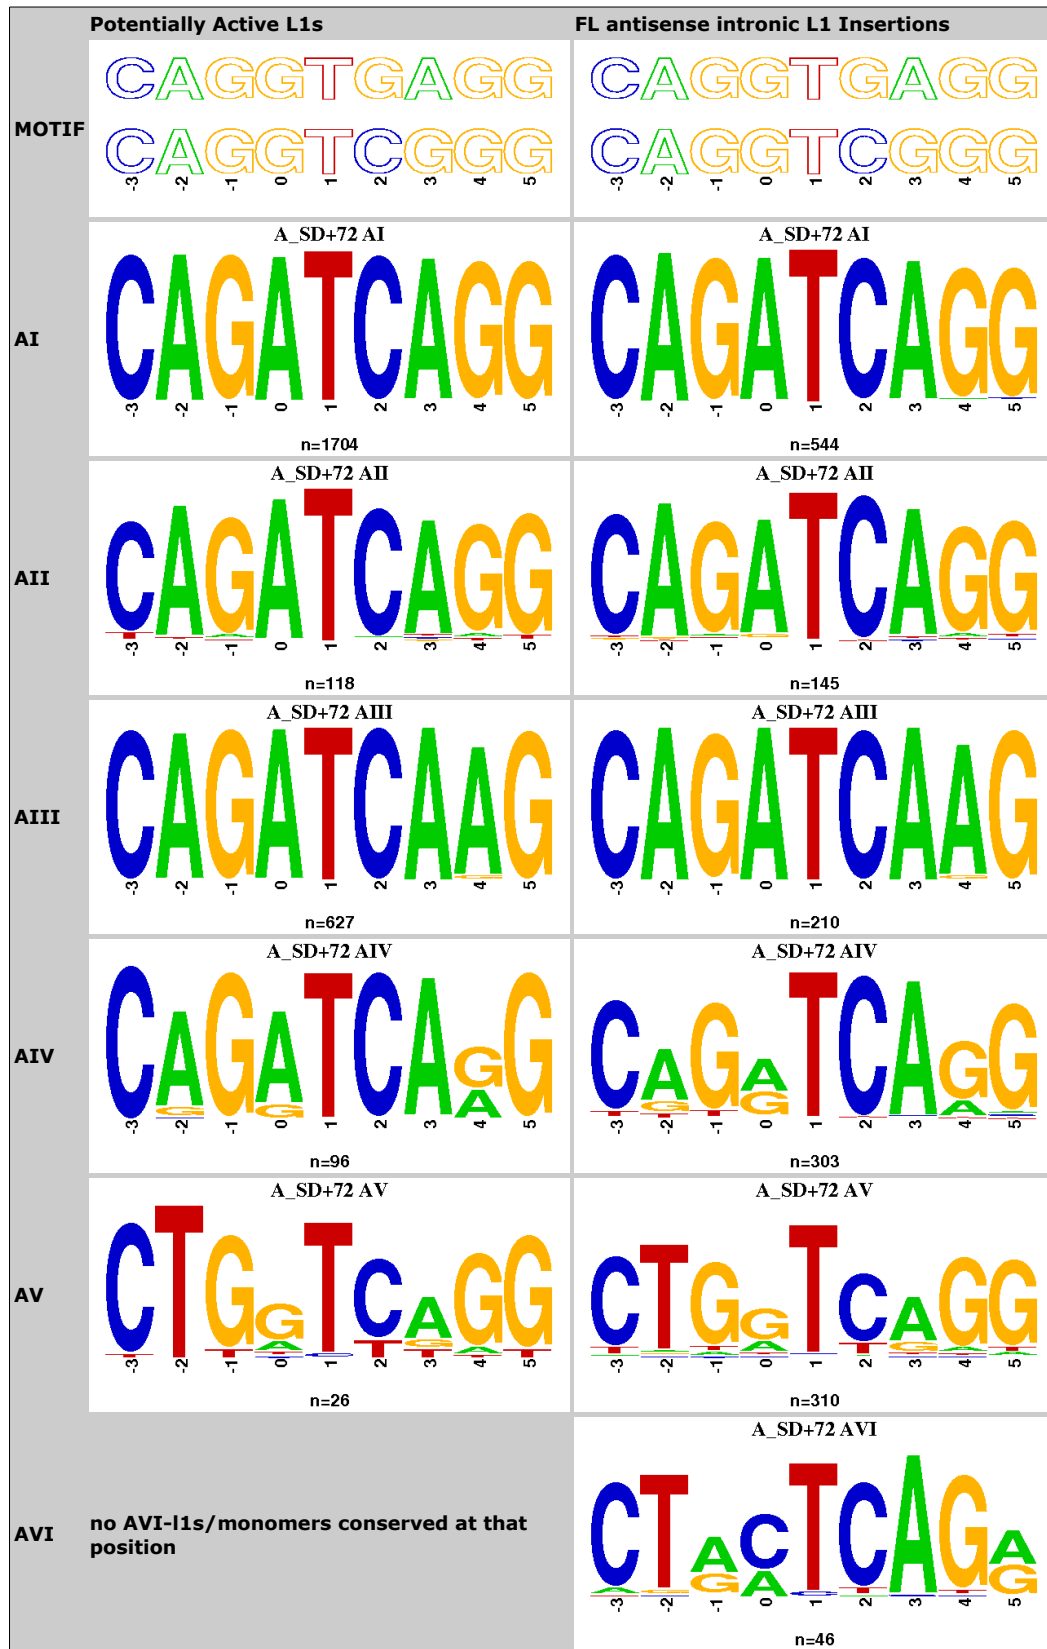

A\_SD+122

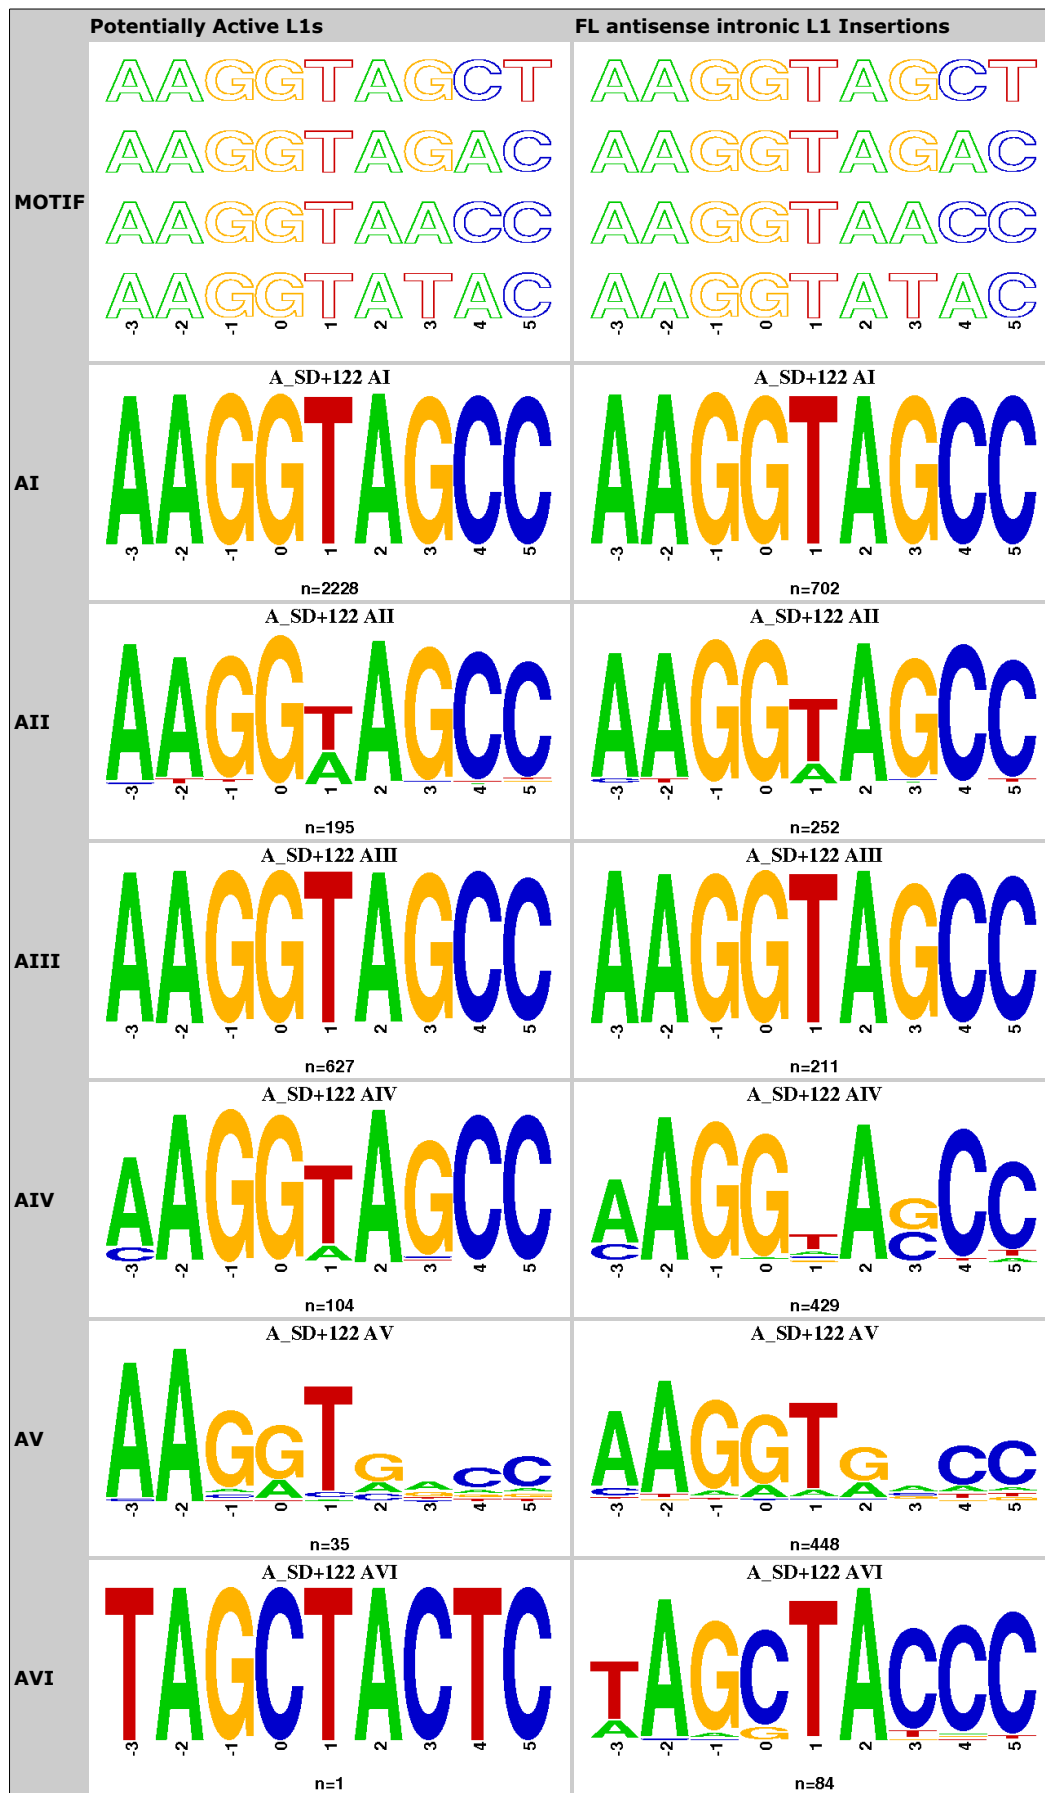

# F\_SA+100

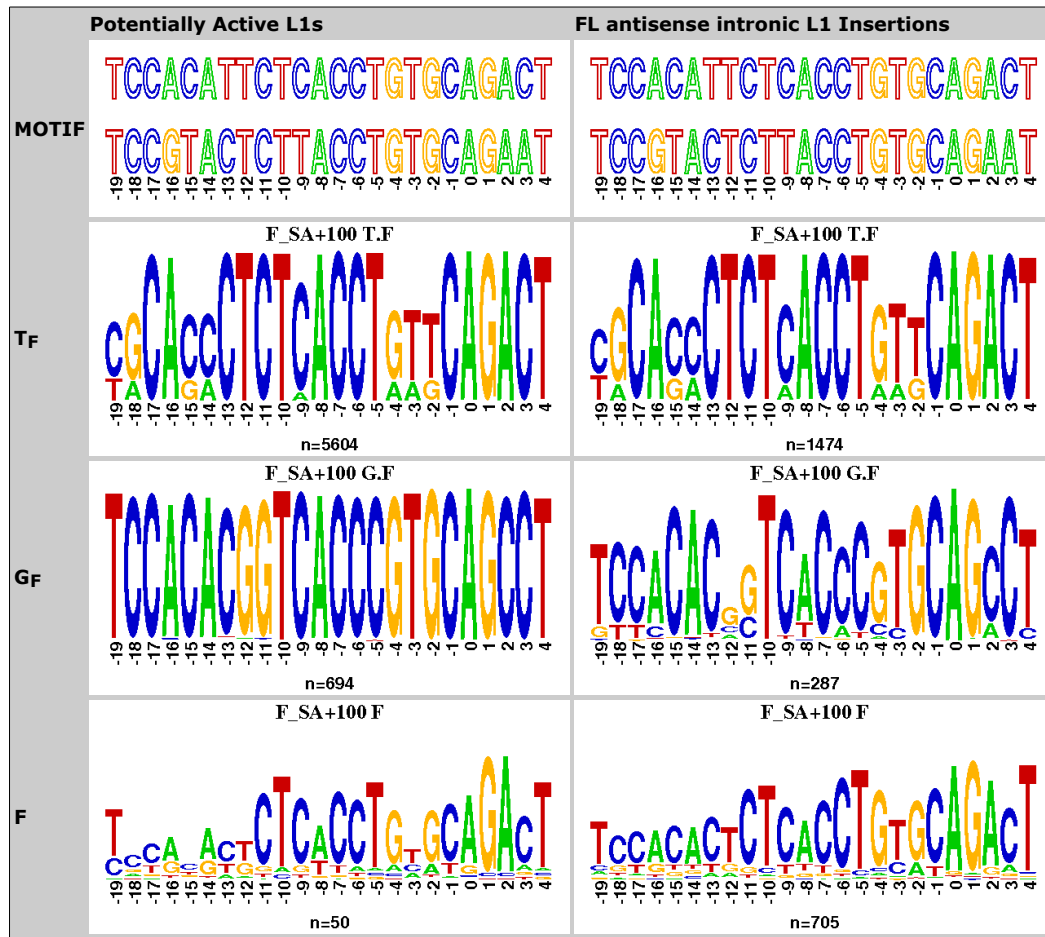

# F\_SA+142

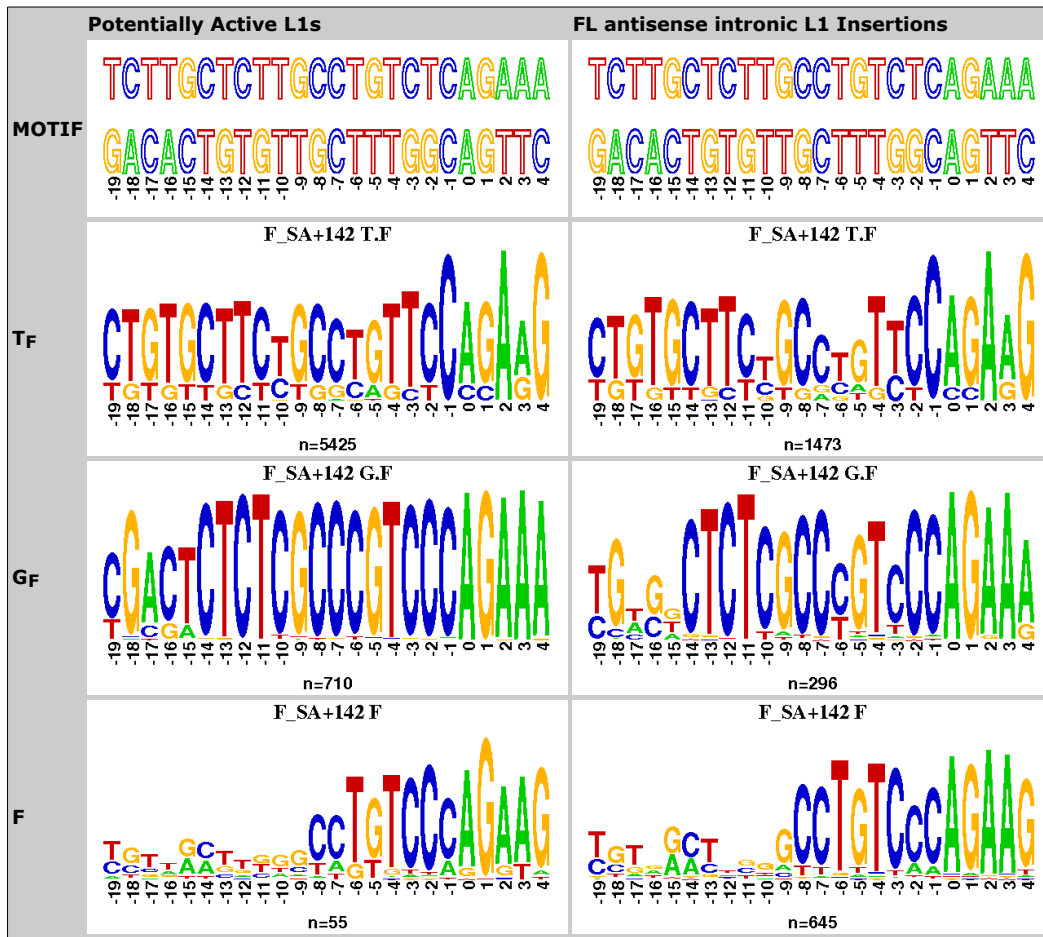

# F\_SA+213

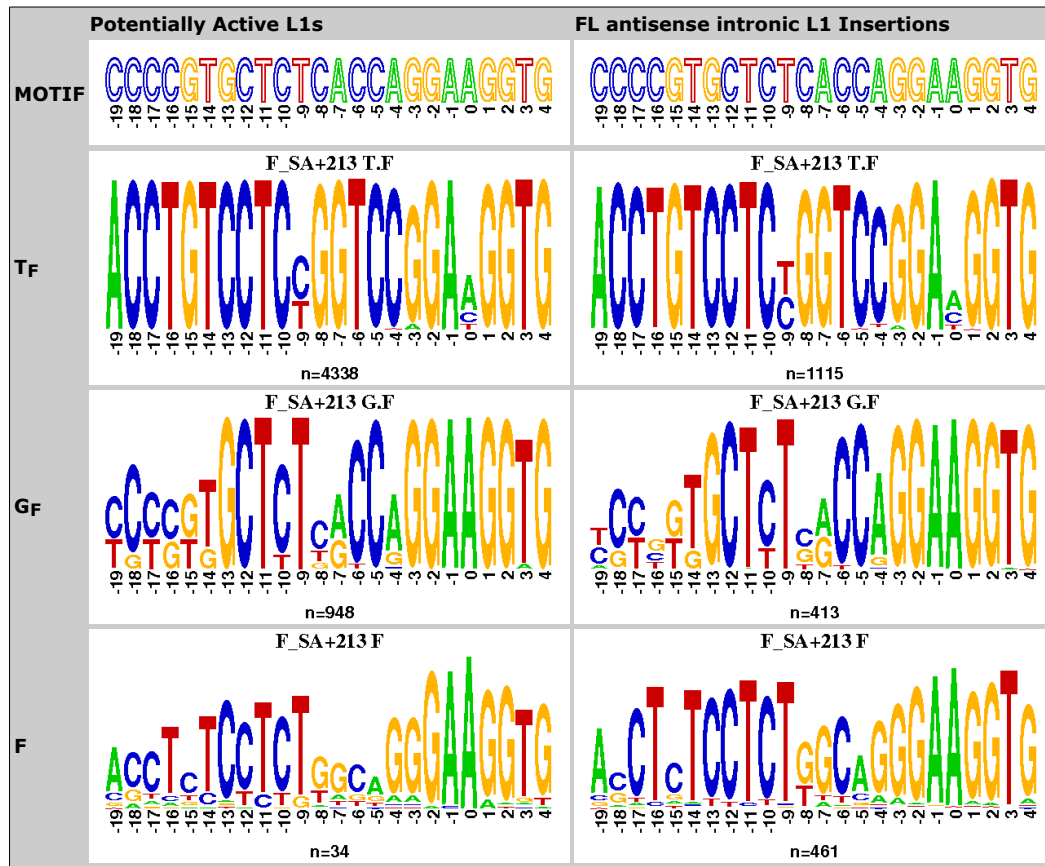

# F\_SA+218

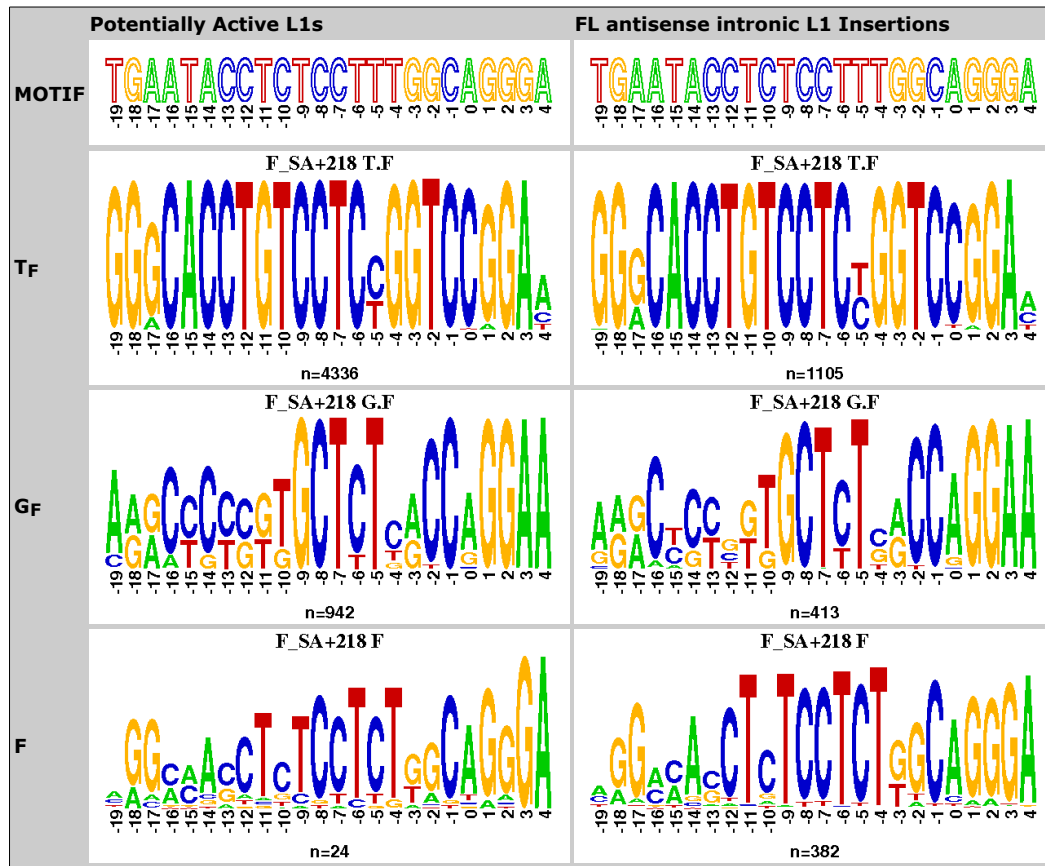

# F\_SD+24

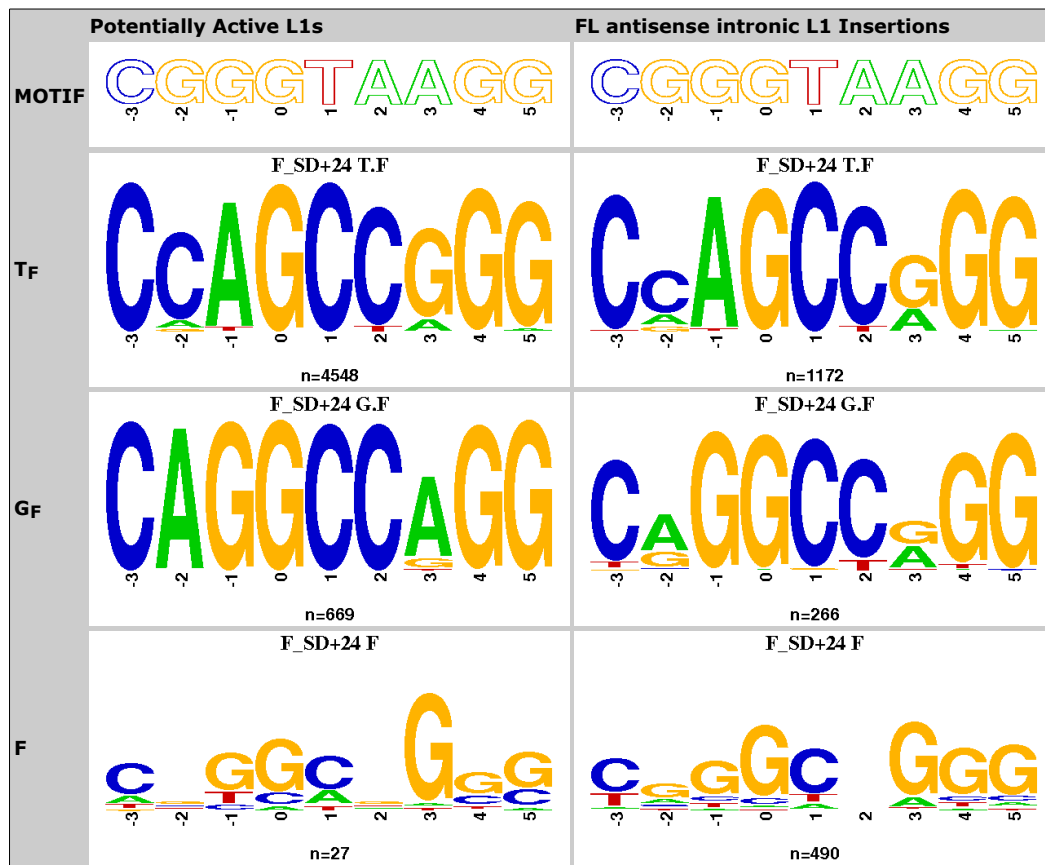

# F\_SD+213

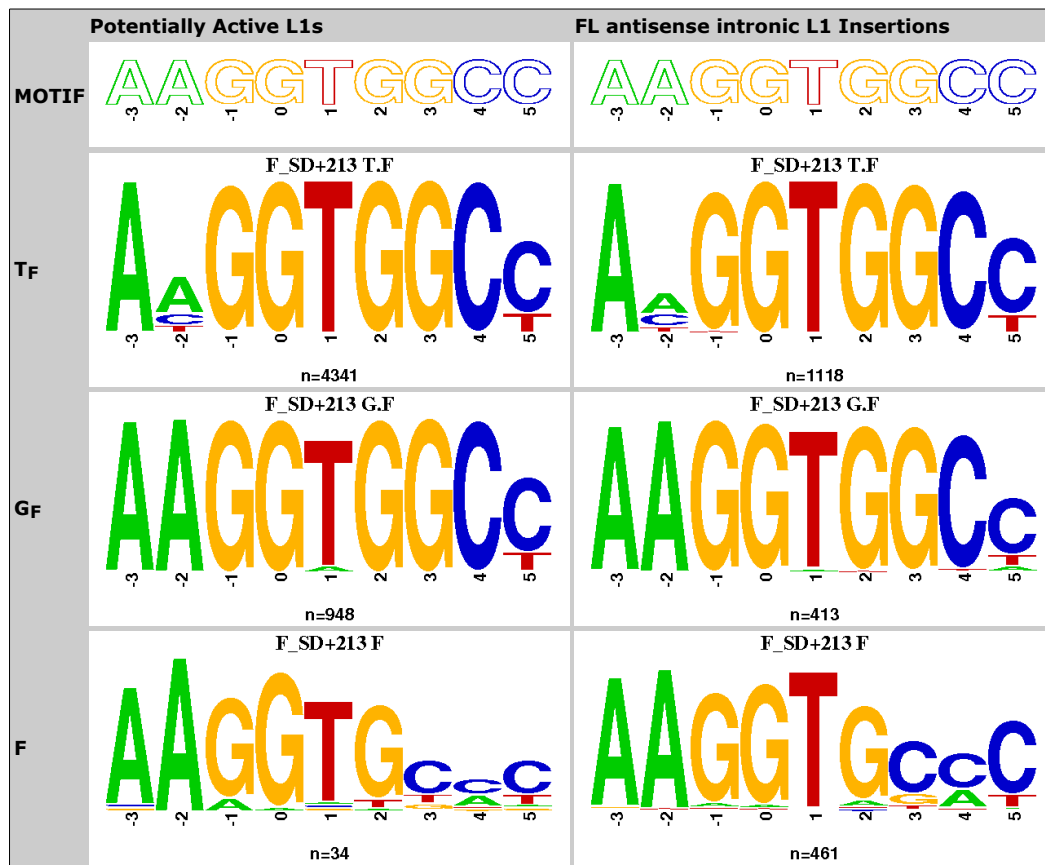



# F\_SD+218

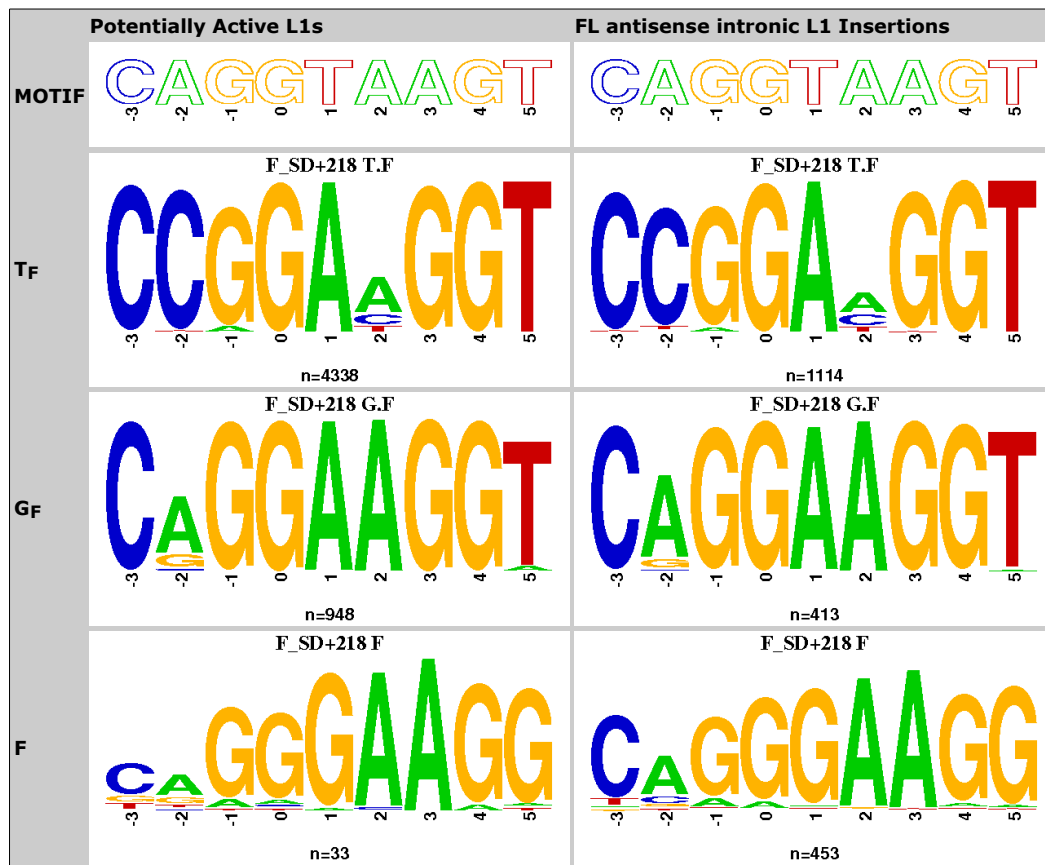

S\_SA+1237

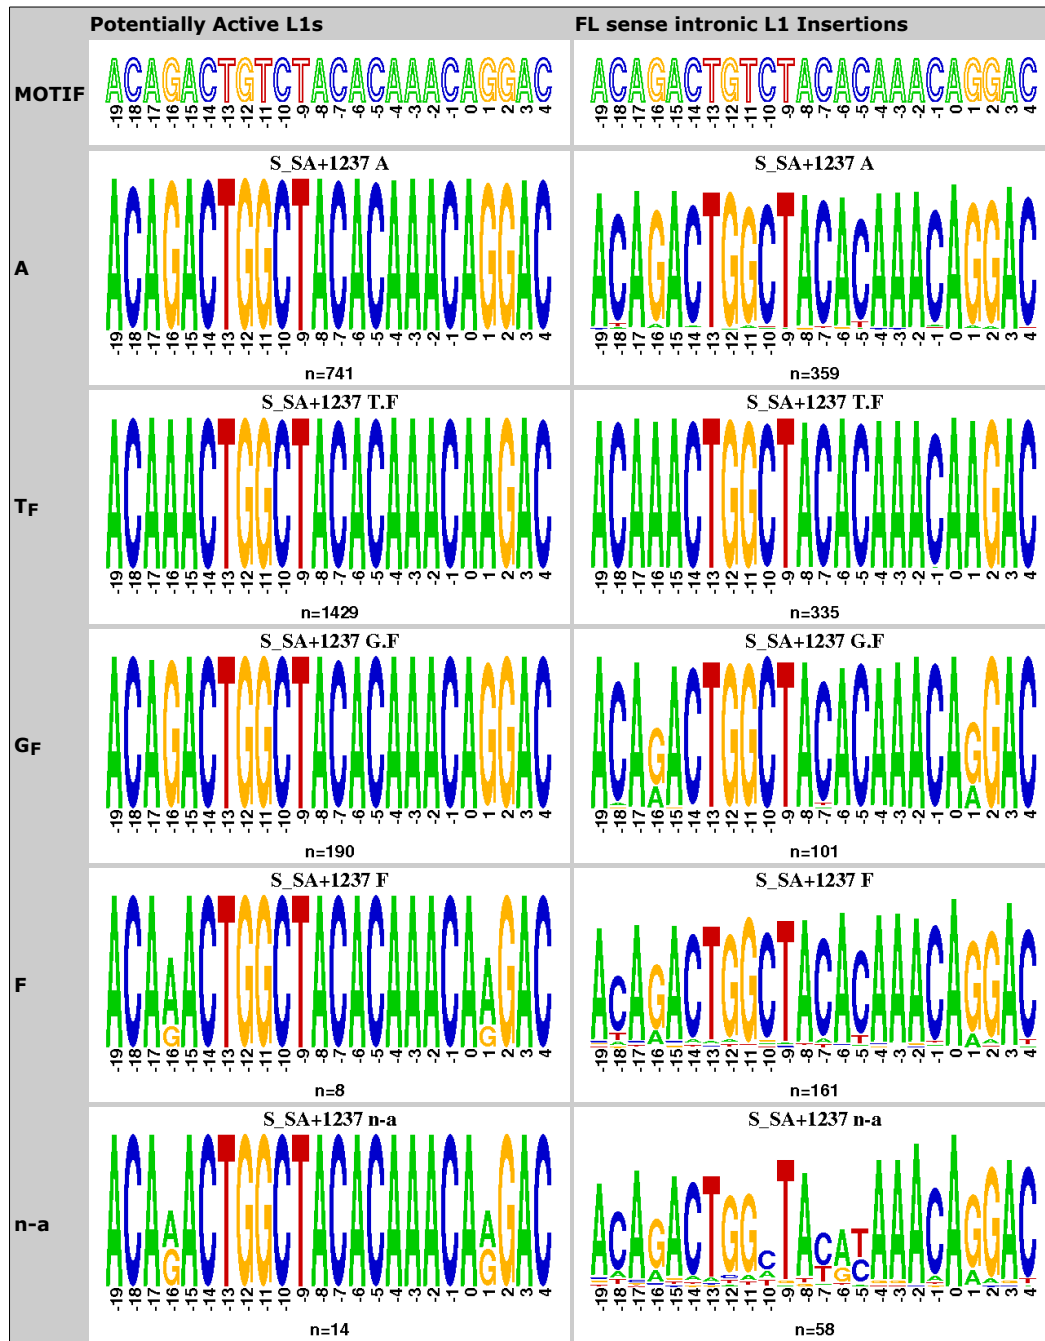

**BG\_SA+4578**

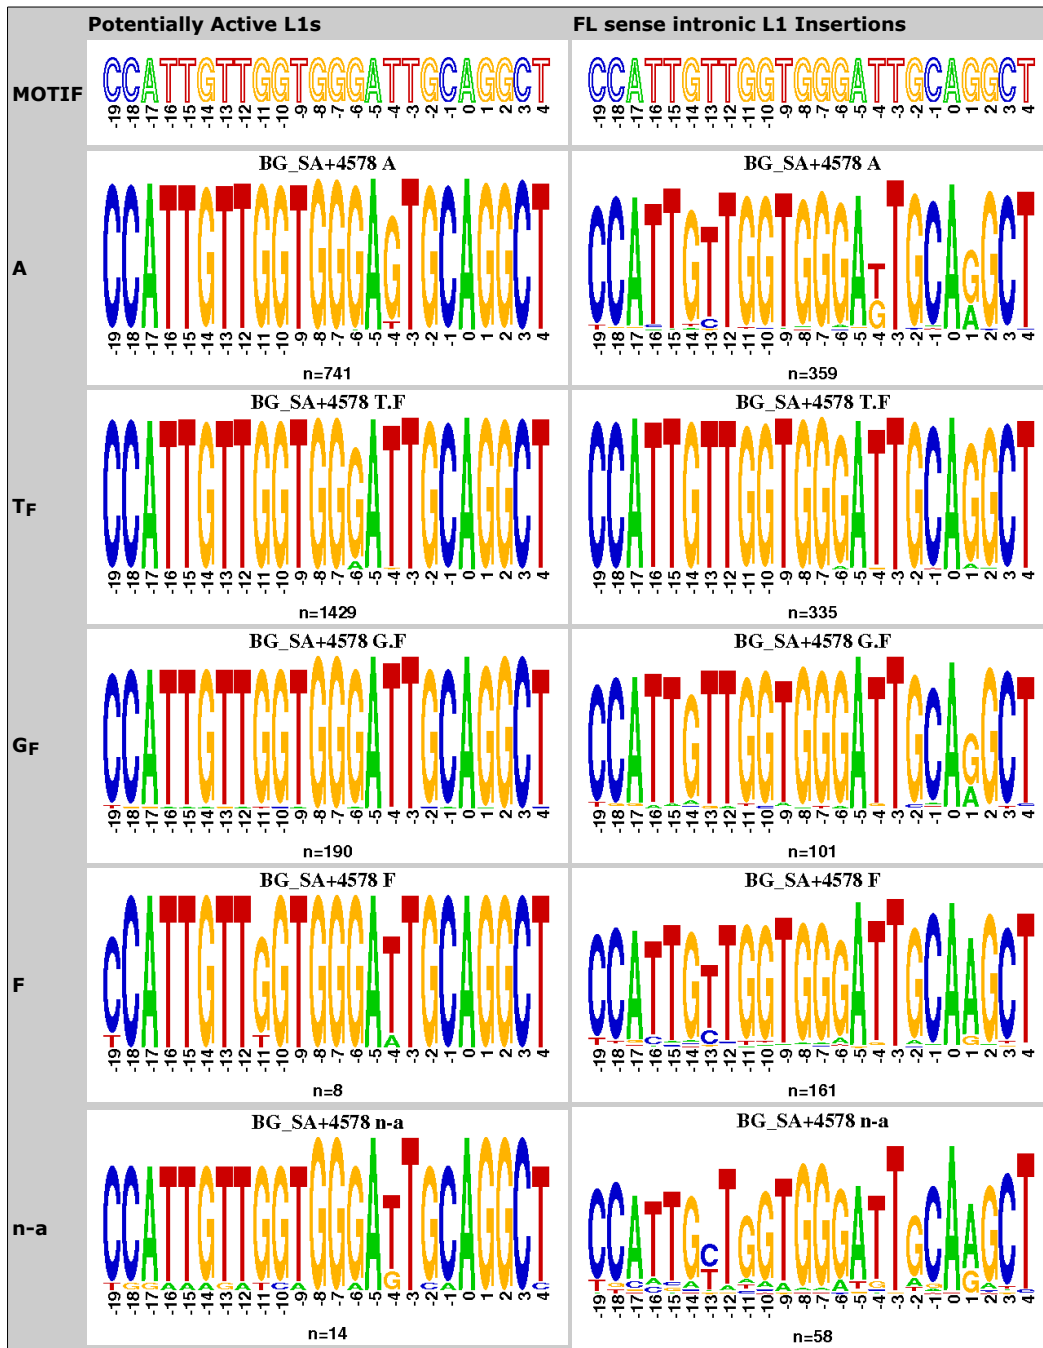

**BG\_SD+4694**

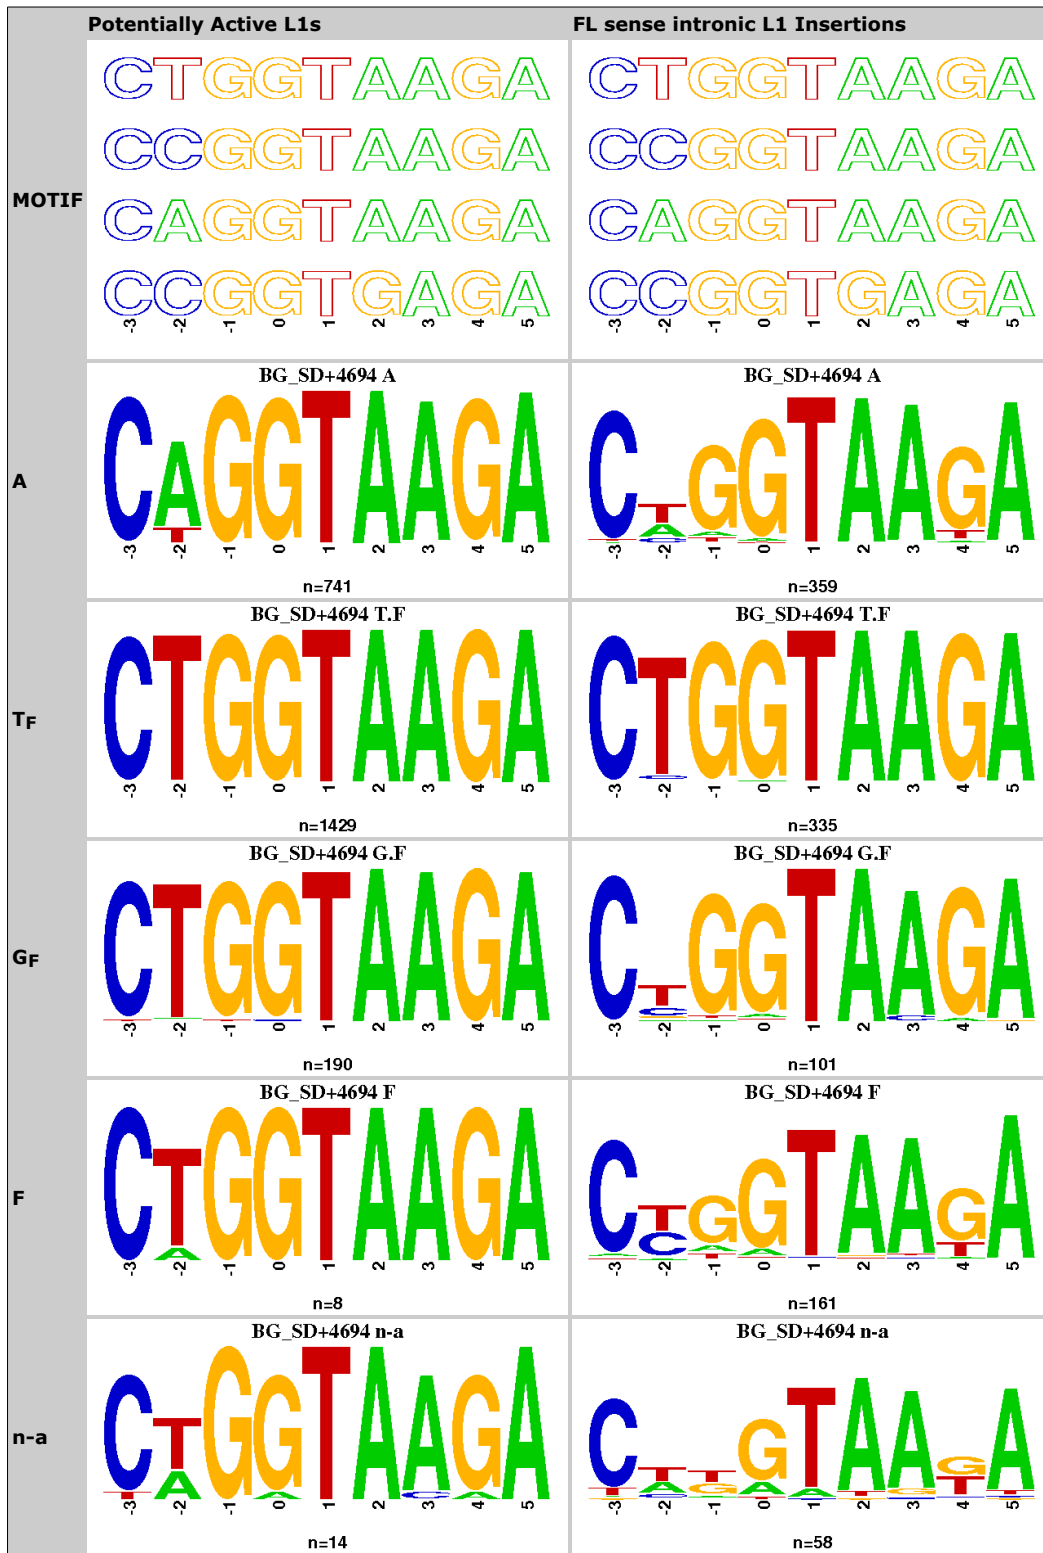

**BG\_SD+4903**

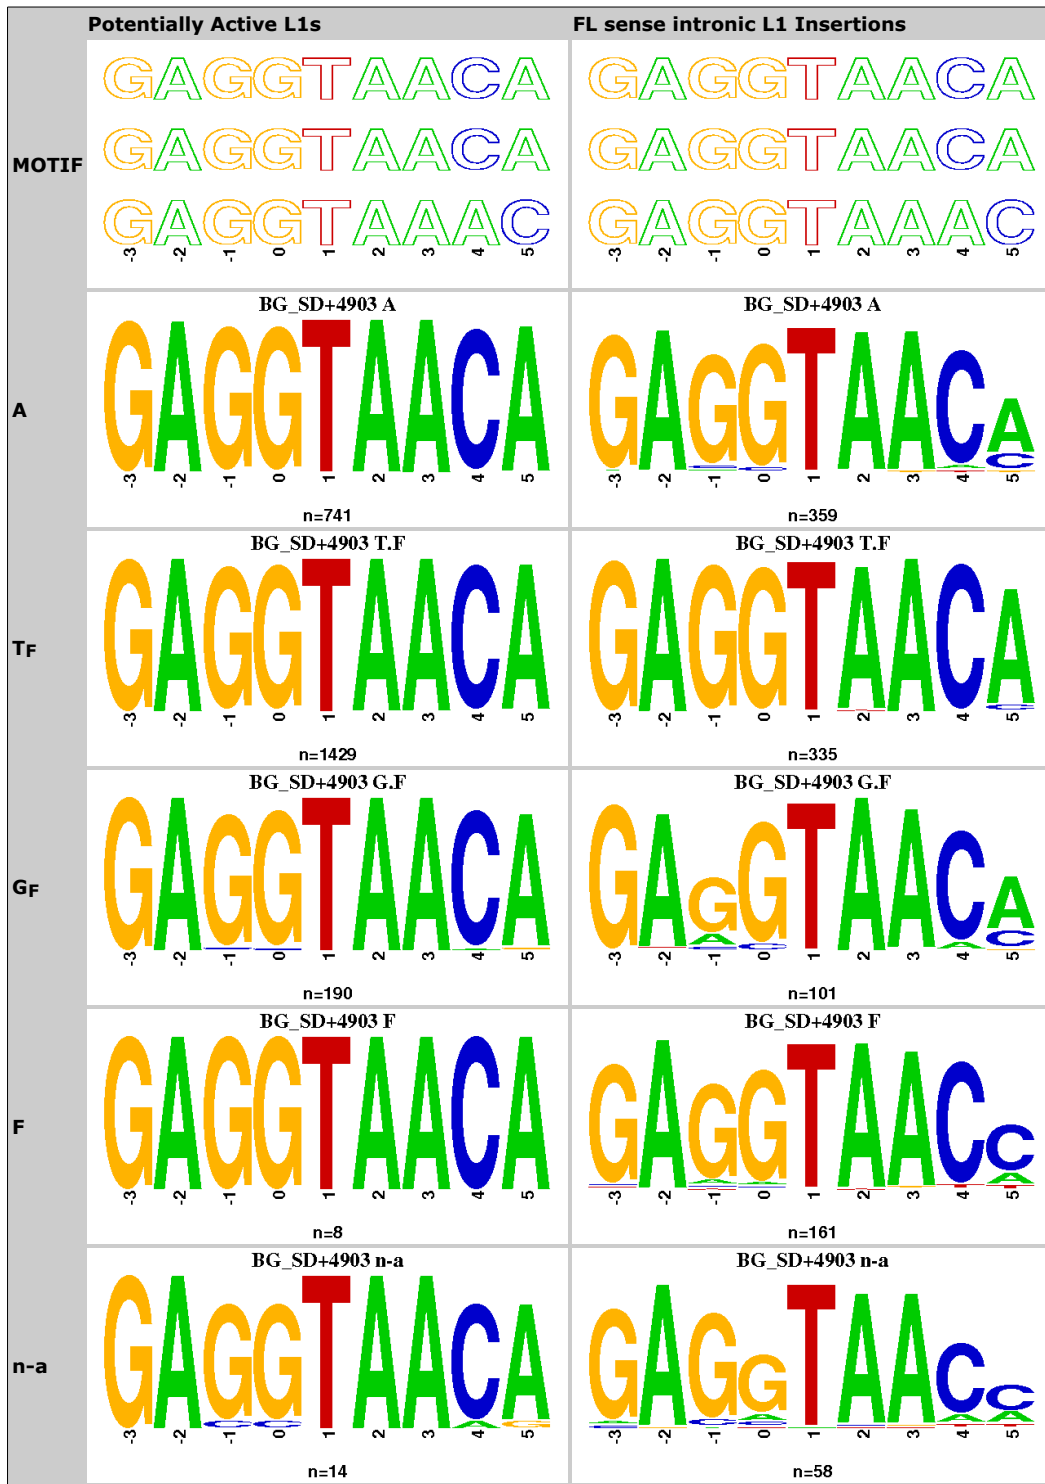

Supplement: 1471-2164-8-392-S2.pdf [file 1471-2164-8-392-S2.pdf]
