# Supplementary material for: Exonization of active mouse L1s: a driver of transcriptome evolution?
Source: PubMed Central journal article supplement (PMC2176070; doi:10.1186/1471-2164-8-392), 2007-10-26

A

Antisense intronic FL L1s

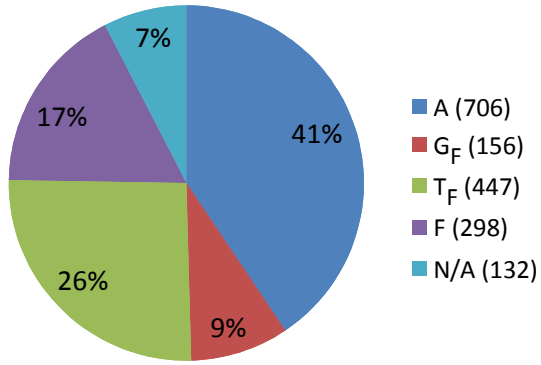

Sense intronic FL L1s

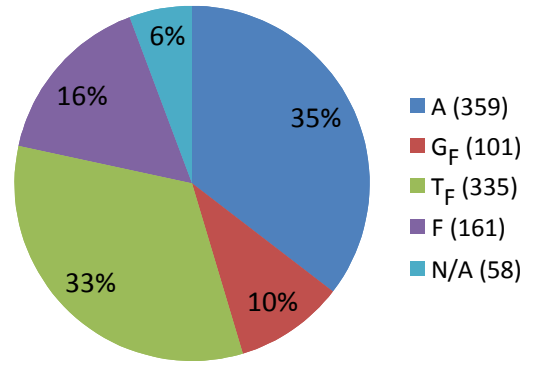

B

FL intergenic

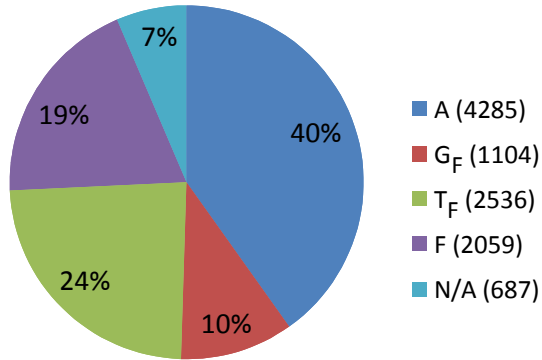

Supplement: 1471-2164-8-392-S3.pdf [file 1471-2164-8-392-S3.pdf]
